# Supplementary material for: Dicationic dibenzo[1,4]azaborine with an open-shell electronic structure
Source: Royal Society of Chemistry journal article supplement (doi:10.1039/d5cc01762a), 2025-01-01
Supplement: d5cc01762a2.pdf [file d5cc01762a2.pdf]

## Contents

|                                                                                 |    |
|---------------------------------------------------------------------------------|----|
| S1. General methods .....                                                       | 2  |
| S2. Synthesis .....                                                             | 3  |
| S3. Supplementary Details of Cyclic voltammetry Measurements and Analysis ..... | 5  |
| S4. Single crystal X-ray Diffraction Measurements and Analysis .....            | 6  |
| S5. Electron Spin Resonance (ESR) Measurements.....                             | 9  |
| S6. Theoretical Calculations .....                                              | 11 |
| S7. References.....                                                             | 24 |
| S8. NMR Charts.....                                                             | 26 |
| S9. HR-MS.....                                                                  | 28 |

## ***S1. General methods***

**Synthesis:** All the synthetic manipulations were performed under a dry an argon atmosphere using standard Schlenk techniques. Unless otherwise noted, materials obtained from commercial suppliers were used without further purification. Column chromatography was performed using Wako Silica-gel 70 PF254 or Kanto Silica Gel 60 (spherical, particle size 100-210  $\mu\text{m}$ ).

**$^1\text{H}$  and  $^{13}\text{C}$ -NMR measurements:**  $^1\text{H}$ -,  $^{13}\text{C}$ -, spectra were recorded with a Bruker AVANCE III ( $^1\text{H}$ -NMR 400 MHz,  $^{13}\text{C}$ -NMR 100 MHz). Variable temperature (VT)-NMR measurements were recorded with a JEOL ECS-400 ( $^1\text{H}$ -NMR 400 MHz).  $^1\text{H}$ -NMR spectra are reported as follows: chemical shift in ppm relative to the chemical shift of  $\text{CD}_2\text{Cl}_2$  at 5.32 ppm, integration, multiplicities ( $s$  = singlet,  $d$  = doublet,  $t$  = triplet,  $dd$  = double doublet,  $m$  = multiplet), and coupling constants ( $\text{Hz}$ ).  $^{13}\text{C}$ -NMR spectra reported in ppm relative to the central line of quintet for  $\text{CD}_2\text{Cl}_2$  at 53.84 ppm.

**Cyclic voltammetry:** Electrochemical measurements were performed under dry argon atmosphere using a BAS Electrochemical Analyzer Model 1210C, a glassy carbon working electrode (diameter: 3 mm), a Pt wire counter electrode, and an Ag wire/ $\text{AgNO}_3$  in MeCN reference electrode.

**Mass spectrometry:** High-resolution mass spectra (HRMS) were recorded on a Bruker micrOTOF mass spectrometer (ionization mode: APCI or ESI). Tuning Mix (Agilent Technologies, Inc.) or sodium formate in MeOH was used as an external standard.

**Variable temperature (VT) ESR measurements:** ESR spectra were recorded on an X-band ESR spectrometer (JES-FA200; JEOL). The  $g$ -factor and ESR signal intensity were calibrated based on  $\text{Mn}^{2+}$  marker signal.

**Ultraviolet-visible-near infrared (UV-vis-NIR) spectroscopy:** UV-vis-NIR spectra were recorded on a Shimadzu UV-3101PC spectrometer.

**Single crystal X-ray (scXRD) diffraction:** scXRD measurements were carried out on a Rigaku MicroMax-007HF diffractometer equipped with a VariMax light source ( $\text{Mo K}\alpha$ ,  $\lambda = 0.71073 \text{ \AA}$ ).

## S2. Synthesis

**Br<sub>2</sub>DBAB**<sup>[S1]</sup> and tris(4-bromophenyl)ammoniumyl hexafluoroantimonate<sup>[S2]</sup> were synthesized following the reported procedures.

### Synthesis of **Dpa<sub>2</sub>DBAB**

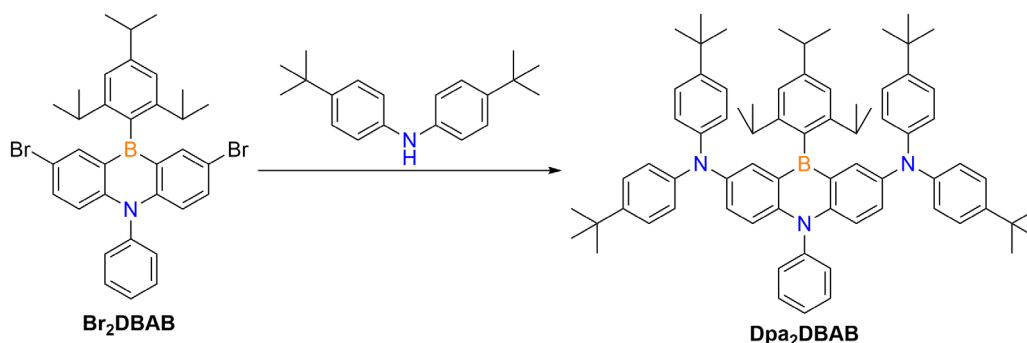

**Scheme S1.** Synthesis of **Dpa<sub>2</sub>DBAB**

A toluene (50 mL) solution of **Br<sub>2</sub>DBAB** (1.00 g, 1.63 mmol), bis(4-*tert*-butylphenyl)amine (0.96 g, 3.41 mmol), Pd(OAc)<sub>2</sub> (0.04 g, 0.16 mmol), [*t*Bu<sub>3</sub>PH]BF<sub>4</sub> (0.18 g, 0.33 mmol) and *t*BuONa (0.94 g, 9.75 mmol) was stirred at 110 °C for 48 h. The reaction was quenched with aq. NH<sub>4</sub>Cl and extracted with ethyl acetate. The organic layer was dried over Na<sub>2</sub>SO<sub>4</sub> and concentrated. The mixture was purified by column chromatography (SiO<sub>2</sub>, hexane to hexane/dichloromethane 10:1 to 1:1 v/v) to afford **Dpa<sub>2</sub>DBAB** (0.40 g, 0.39 mmol, 24%) as a light yellow solid.

Note: **Dpa<sub>2</sub>DBAB** is light and air sensitive. The color gradually changed from light yellow to light green under air. Therefore, **Dpa<sub>2</sub>DBAB** was kept under an argon atmosphere in the dark.

**<sup>1</sup>H-NMR** (400 MHz, CD<sub>2</sub>Cl<sub>2</sub>): δ = 7.64 (*t*, *J* = 7.6 Hz, 2H), 7.55 (*t*, *J* = 7.6 Hz, 2H), 7.41–7.38 (*m*, 4H), 7.17 (*dd*, *J* = 4.7, 2.6 Hz, 2H), 7.05 (*d*, *J* = 9.2 Hz, 8H), 6.80 (*s*, 2H), 6.75 (*d*, *J* = 8.8 Hz, 8H), 6.70 (*d*, *J* = 9.2 Hz, 2H), 2.79–2.73 (*m*, 1H), 2.34–2.27 (*m*, 2H), 1.16–1.14 (*m*, 42H), 0.79 (*d*, *J* = 6.8 Hz, 12H). (Figure S17)

**<sup>13</sup>C-NMR** (100 MHz, CD<sub>2</sub>Cl<sub>2</sub>): δ = 150.6, 148.2, 146.0, 144.7, 143.5, 142.3, 140.0, 134.3, 132.6, 131.3, 130.6, 129.5, 126.2, 122.2, 120.0, 118.7, 35.4, 34.5(2), 34.5(4), 24.5, 24.2. (Two signals corresponding to B-C carbon could not be observed, Figure S18)

**HRMS** (APCI, Positive) calcd. for C<sub>73</sub>H<sub>86</sub>BN<sub>3</sub> [M+nH]<sup>+</sup> : 1016.6999. Found: 1016.6848. (Figure S19)

## Synthesis of $[\text{Dpa}_2\text{DBAB}](\text{SbF}_6)_2$

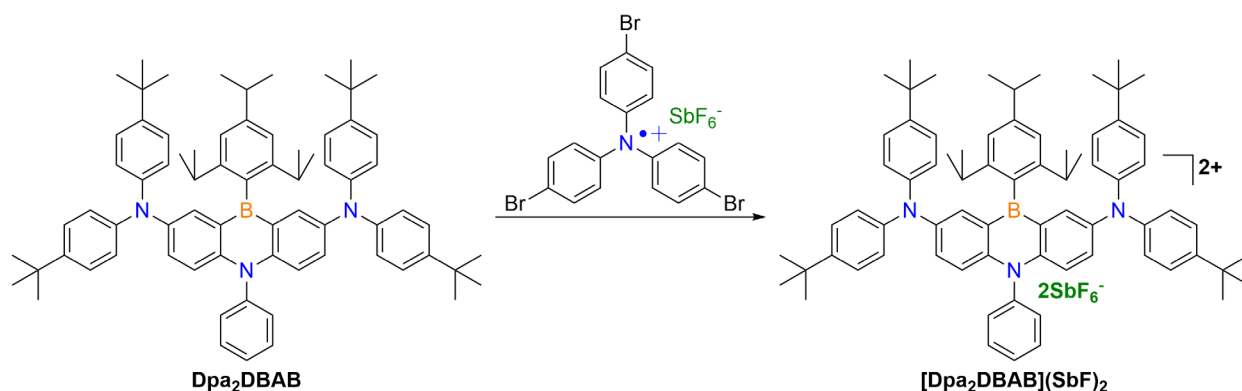

**Scheme S2.** Synthesis of  $[\text{Dpa}_2\text{DBAB}](\text{SbF}_6)_2$

A dichloromethane (15 mL) solution of **Dpa<sub>2</sub>DBAB** (50.0 mg, 0.05 mmol) and **MB** (77.7 mg, 0.11 mmol) was stirred at 20 °C for 2 h in the dark. To the mixture, diethyl ether was added slowly and cooled to 0 °C slowly. The precipitated crystals were further washed by diethyl ether to afford **[Dpa<sub>2</sub>DBAB](SbF<sub>6</sub>)<sub>2</sub>** (33.4 mg, 0.02 mmol, 45%) as dark violet crystals.

**HRMS** (ESI, Positive): Calcd. for  $\text{C}_{73}\text{H}_{86}\text{BN}_3\text{SbF}_6$   $[\text{M}]^+$ : 1252.5852. Found: 1252.6041. (Figure S20)

**Anal.**: Calcd. For  $\text{C}_{73}\text{H}_{86}\text{BN}_3\text{Sb}_2\text{F}_{12} + \text{CH}_2\text{Cl}_2 + \text{C}_4\text{H}_{10}\text{O}$ : C, 56.89; H, 6.00; N, 2.55%. Found: C, 56.55; H, 6.01; N, 2.62%.

### S3. Supplementary Details of Cyclic voltammetry Measurements and Analysis

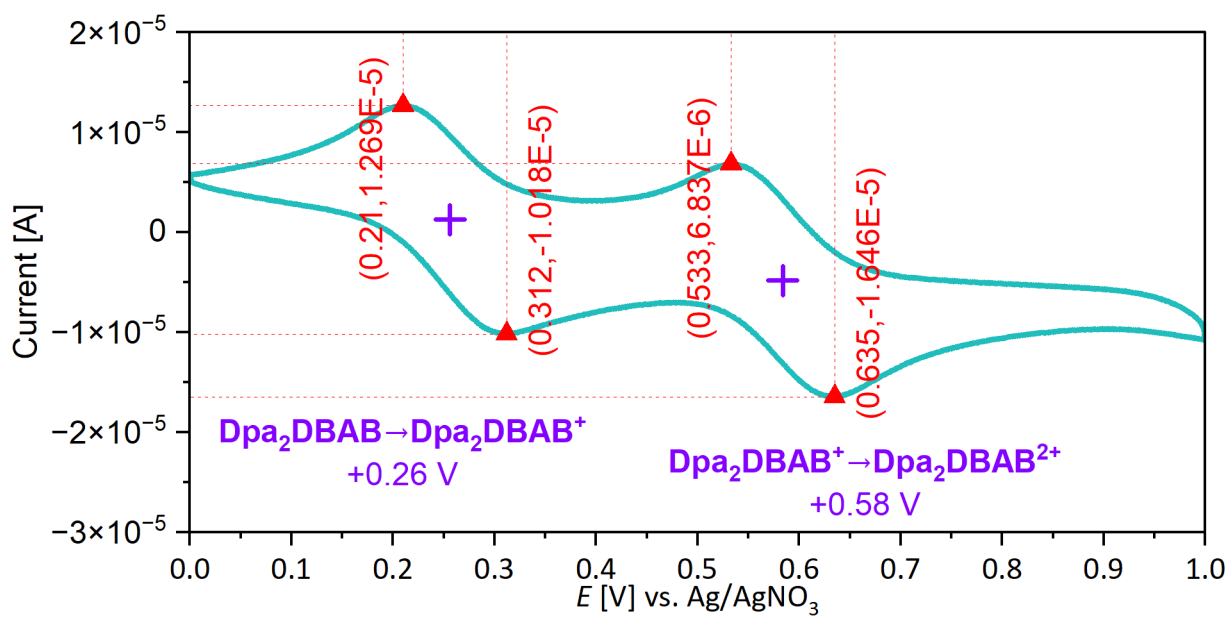

**Figure S1.** Oxidation and reduction peaks, as well as the estimated oxidation potentials of **Dpa<sub>2</sub>DBAB**.

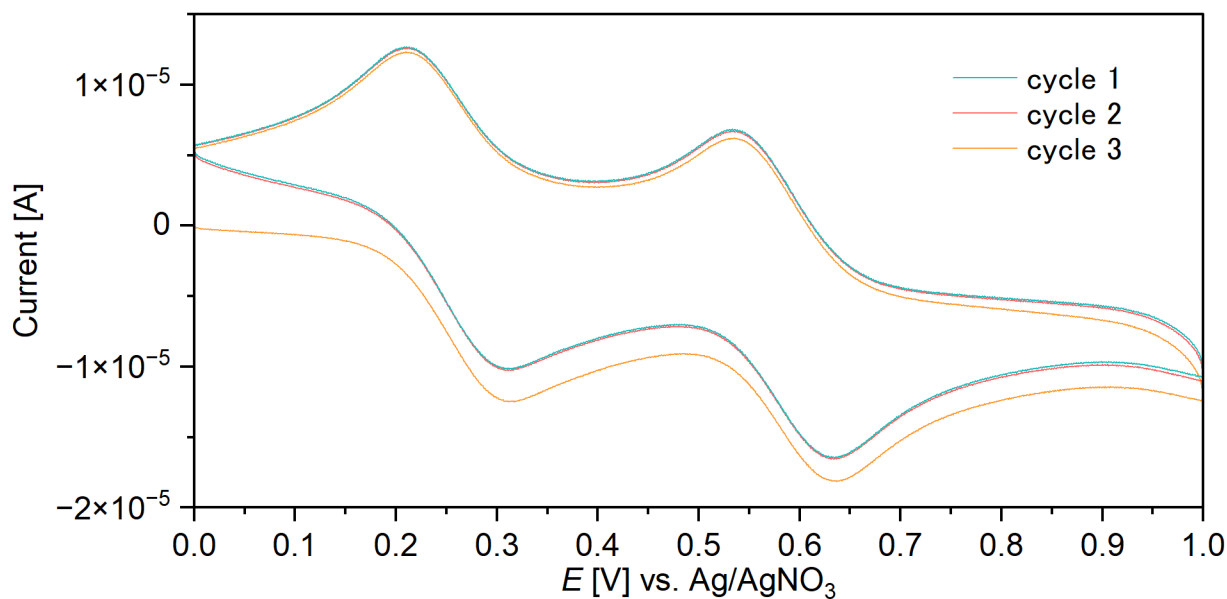

**Figure S2.** Repeated cyclic voltammograms (3 cycles) of **Dpa<sub>2</sub>DBAB**.

#### S4. Single crystal X-ray Diffraction Measurements and Analysis

Single crystal X-ray diffraction (scXRD) measurements were carried out on a Rigaku MicroMax-007HF diffractometer equipped with a VariMax light source (Mo  $K\alpha$ ,  $\lambda = 0.71073$  Å). The crystals were kept at  $-100$  °C while the data collection. The collected data were processed using the CrysAlisPro (ver. 1.171.41.117a) program package (Rigaku Oxford Diffraction, 2021). Using Olex2,<sup>[S3]</sup> the structures were solved with the SHELXT and refined with the SHELXL program packages.<sup>[S4]</sup> The full-matrix least-squares refinements were performed on  $F^2$ . All non-hydrogen atoms were refined anisotropically. Hydrogen atoms were refined using the riding model. Two counter  $\text{SbF}_6^-$  anions and one  $\text{Et}_2\text{O}$  molecule were found per one **Dpa2DBAB**<sup>2+</sup> moiety (Figure S3, Figure S4). The two  $\text{SbF}_6^-$  counter anions were disordered over two sites, with the occupancy ratios of 0.294:0.706 and 546:454, respectively. The SIMU and RIGU restraints were included for the anisotropic displacement parameters of these disordered counter anions. CCDC 2387211 (**[Dpa2DBAB](SbF<sub>6</sub>)<sub>2</sub>**) contains the additional crystallographic data.<sup>[S5]</sup>

**Table 1.** Crystallographic data for **[Dpa2DBAB](SbF<sub>6</sub>)<sub>2</sub>**

| <b>[Dpa2DBAB](SbF<sub>6</sub>)<sub>2</sub></b>    |                                                                  |
|---------------------------------------------------|------------------------------------------------------------------|
| Empirical formula                                 | $\text{C}_{77}\text{H}_{96}\text{BF}_{12}\text{N}_3\text{OSb}_2$ |
| Formula weight                                    | 1561.87                                                          |
| Temperature/K                                     | 173.15                                                           |
| Crystal system                                    | triclinic                                                        |
| Space group                                       | $P-1$                                                            |
| $a/\text{\AA}$                                    | 15.2096(4)                                                       |
| $b/\text{\AA}$                                    | 16.6088(6)                                                       |
| $c/\text{\AA}$                                    | 17.4936(7)                                                       |
| $\alpha/^\circ$                                   | 63.221(4)                                                        |
| $\beta/^\circ$                                    | 81.517(3)                                                        |
| $\gamma/^\circ$                                   | 89.492(3)                                                        |
| Volume/ $\text{\AA}^3$                            | 3893.7(3)                                                        |
| Z                                                 | 2                                                                |
| $\rho_{\text{calcd}}/\text{g cm}^{-3}$            | 1.332                                                            |
| $\mu/\text{mm}^{-1}$                              | 0.765                                                            |
| $F(000)$                                          | 1604.0                                                           |
| Crystal size/ $\text{mm}^3$                       | $0.113 \times 0.095 \times 0.055$                                |
| Radiation                                         | Mo $K\alpha$ ( $\lambda = 0.71073$ )                             |
| $2\theta$ range for data collection/ $^\circ$     | 5.576 to 59.768                                                  |
| Index ranges                                      | $-21 \leq h \leq 20, -23 \leq k \leq 23, -24 \leq l \leq 23$     |
| Reflections collected                             | 61213                                                            |
| Independent reflections                           | 20095 [ $R_{\text{int}} = 0.0477, R_{\text{sigma}} = 0.0738$ ]   |
| Data/restraints/parameters                        | 20095/924/1013                                                   |
| Goodness-of-fit on $F^2$                          | 1.016                                                            |
| Final $R$ indexes [ $I \geq 2\sigma(I)$ ]         | $R_1 = 0.0591, wR_2 = 0.1270$                                    |
| Final $R$ indexes [all data]                      | $R_1 = 0.1075, wR_2 = 0.1437$                                    |
| Largest diff. peak and hole / $\text{e \AA}^{-3}$ | 0.90/-0.68                                                       |

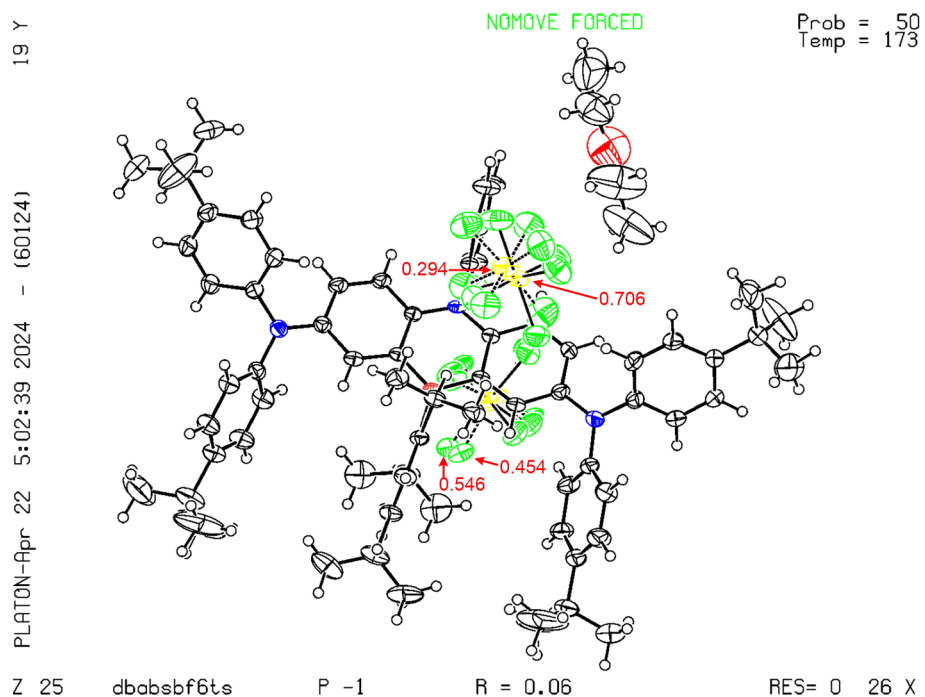

**Figure S3.** Thermal ellipsoid plots of **[Dpa2DBAB](SbF<sub>6</sub>)<sub>2</sub>** with one Et<sub>2</sub>O molecule and disordered counter **SbF<sub>6</sub><sup>-</sup>** anions.

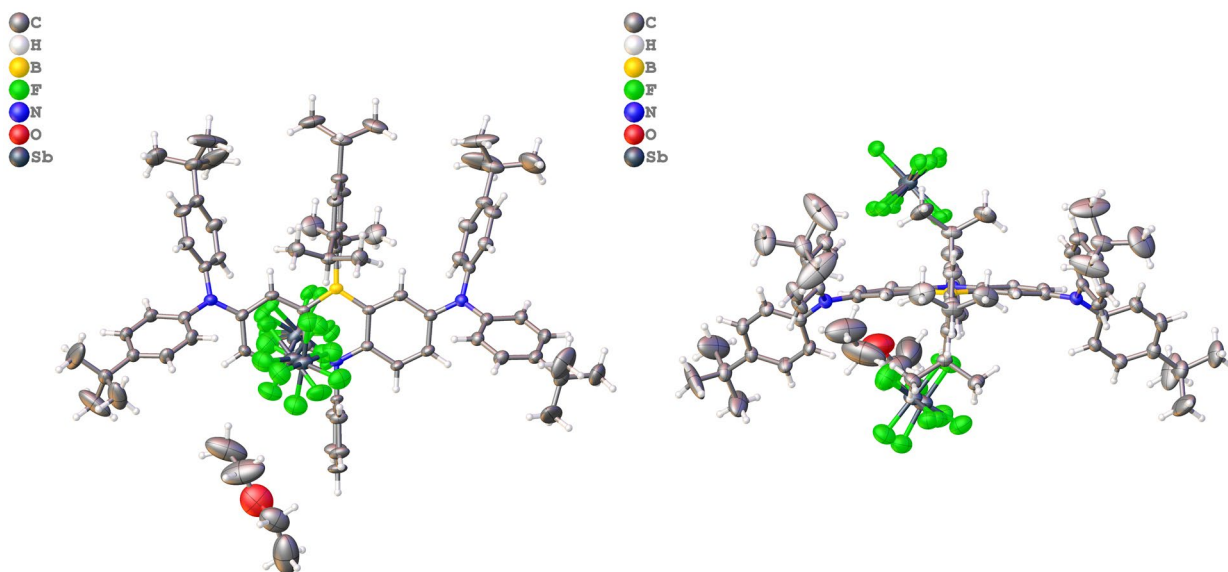

**Figure S4.** Top view (left) and side view (right) of the scXRD detected molecular structures of **[Dpa2DBAB](SbF<sub>6</sub>)<sub>2</sub>**.

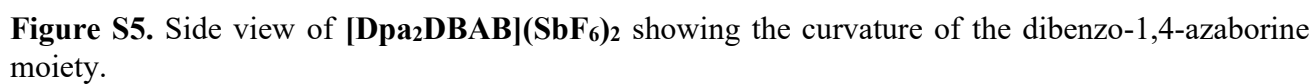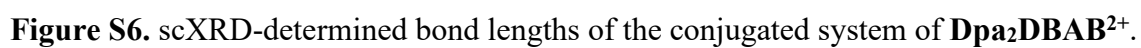



## S5. Electron Spin Resonance (ESR) Measurements

Powder of **[Dpa2DBAB](SbF<sub>6</sub>)<sub>2</sub>** was used for the VT-ESR measurements and the VT-ESR data was fitted by modified Bleaney-Bowers equation. Here, we describe the approach to the singlet-triplet energy gap  $\Delta E_{S-T}$ .

As there was no significant change in the linewidth of the signals, the ESR signal intensity of powder **[Dpa2DBAB](SbF<sub>6</sub>)<sub>2</sub>** normalized by Mn<sup>2+</sup> marker obeys:

$$I_{\text{singal}}/I_{\text{Mn}} \propto \chi \quad [\text{Eq. S1}]$$

where  $I_{\text{singal}}$  is the double integral of the **[Dpa2DBAB](SbF<sub>6</sub>)<sub>2</sub>** ESR spectral,  $I_{\text{Mn}}$  is the double integral of the Mn<sup>2+</sup> mark signal,  $\chi$  is the magnetic susceptibility.

By letting  $\chi$  (arb. unit) be  $I_{\text{singal}}/I_{\text{Mn}}$ , the  $\chi$  (arb. unit) is expected to follow the Bleaney-Bowers equation below:

$$\chi = \frac{1}{T} \frac{A}{3 + \exp\left(-\frac{\Delta E_{S-T}}{k_B T}\right)} \quad [\text{Eq. S2}]$$

where  $A$  is a constant,  $k_B$  is Boltzmann constant.

In this study, to correspond the contribution of paramagnetic impurity, the equation was modified with an offset obeying the Curie's law:

$$\chi = \frac{B}{T} + \frac{1}{T} \frac{A}{3 + \exp\left(-\frac{\Delta E_{S-T}}{k_B T}\right)} \quad [\text{Eq. S3}]$$

where  $B$  is a constant.

Based on equation S3, a fitting on the  $\chi T$  vs.  $T$  plot of **[Dpa2DBAB](SbF<sub>6</sub>)<sub>2</sub>** was carried out via the following equation:

$$\chi T = B + \frac{A}{3 + \exp\left(-\frac{C}{T}\right)} \quad [\text{Eq. S4}]$$

where  $A$  and  $B$  are constant,  $C$  could be expressed by the following equation:

$$C = \frac{\Delta E_{S-T}}{k_B} = \frac{2J}{k_B} \quad [\text{Eq. S5}]$$

The fitting gave a  $C$  in  $-674$  K, and the  $\Delta E_{S-T}$  was calculated out in  $-1.34$  kcal mol<sup>-1</sup>.

Details of earned curve and the values of each parameter were shown below with error (Figure S7).

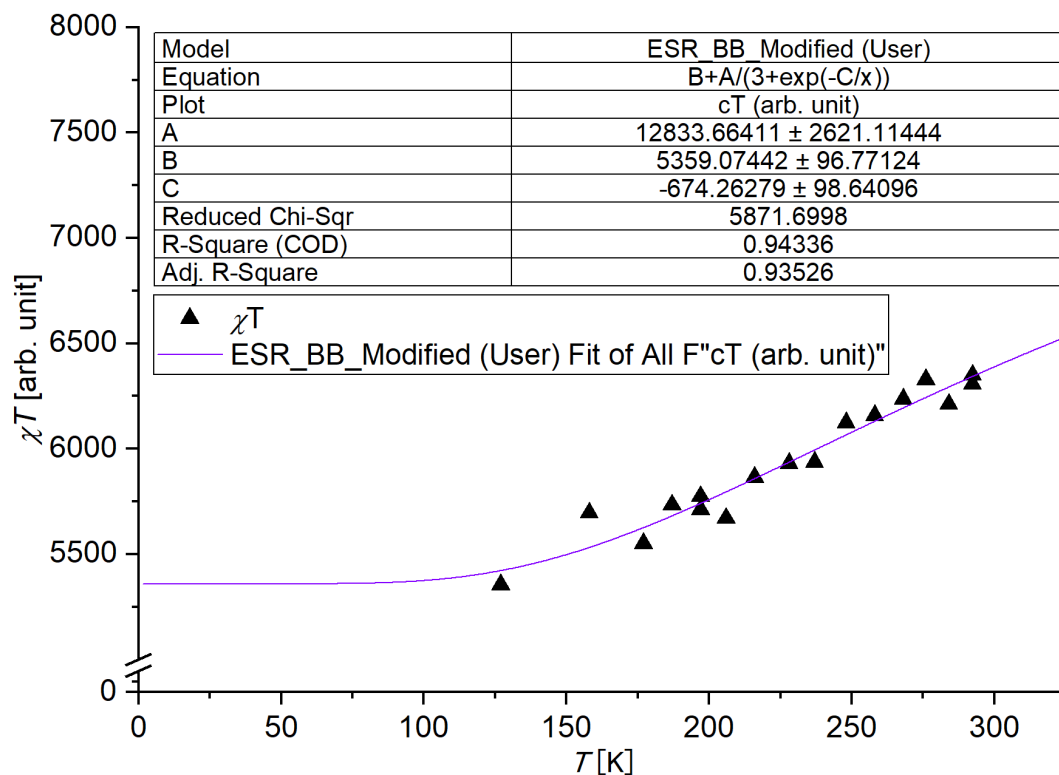

**Figure S7.**  $\chi T$ - $T$  plot for the dication with the fitting curve obtained using the modified Bleaney-Bowers equation. The obtained values of parameters with error bar were also shown.

**Table S2.** Used data for the  $\chi T$ - $T$  plot. ( $\chi$  [arb. unit] =  $I_{\text{signal}}/I_{\text{Mn}}$ )

| $T$   | $1/T$    | $I_{\text{Mn}}$ | $I_{\text{signal}}$ | $I_{\text{signal}}/I_{\text{Mn}}$ | $\chi T$<br>[arb. unit] |
|-------|----------|-----------------|---------------------|-----------------------------------|-------------------------|
| 292.3 | 0.003421 | 1572            | 33918               | 21.58                             | 6307                    |
| 197   | 0.005076 | 1391            | 40764               | 29.31                             | 5773                    |
| 177   | 0.00565  | 1361            | 42684               | 31.36                             | 5551                    |
| 127   | 0.007874 | 1130            | 47646               | 42.16                             | 5355                    |
| 158   | 0.006329 | 971             | 35007               | 36.05                             | 5696                    |
| 187   | 0.005348 | 822             | 25206               | 30.66                             | 5734                    |
| 197   | 0.005076 | 877             | 25428               | 28.99                             | 5712                    |
| 206   | 0.004854 | 896             | 24660               | 27.52                             | 5670                    |
| 216   | 0.00463  | 901             | 24461               | 27.15                             | 5864                    |
| 228   | 0.004386 | 979             | 25463               | 26.01                             | 5930                    |
| 237   | 0.004219 | 1043            | 26126               | 25.05                             | 5937                    |
| 248   | 0.004032 | 1082            | 26719               | 24.69                             | 6124                    |
| 258   | 0.003876 | 1170            | 27930               | 23.87                             | 6159                    |
| 268   | 0.003731 | 1272            | 29599               | 23.27                             | 6236                    |
| 276   | 0.003623 | 1425            | 32672               | 22.93                             | 6328                    |
| 284   | 0.003521 | 1552            | 33947               | 21.87                             | 6212                    |
| 292.3 | 0.003421 | 1518            | 32980               | 21.73                             | 6350                    |

## S6. Theoretical Calculations

All theoretical calculations of **[Dpa<sub>2</sub>DBAB](SbF<sub>6</sub>)<sub>2</sub>** were performed with Gaussian 16 (Revision C.02) program package.<sup>[S6]</sup> The method (U)B3LYP density functional and the 6-311G(d) basis sets were employed for geometry optimizations. All optimized structures were verified by frequency analysis that corresponded to the equilibrium structures.

### Supplemental details of optimizations

**Table S3.** Summary of methods used for optimizations<sup>[a]</sup>

| Compound                                |    |     | Method    |              |       | Additional Conditions         |
|-----------------------------------------|----|-----|-----------|--------------|-------|-------------------------------|
| <b>Dpa<sub>2</sub>DBAB</b>              | -  | DFT | 6-311G(d) | Default Spin | B3LYP | -                             |
| <b>Dpa<sub>2</sub>DBAB<sup>1+</sup></b> | -  | DFT | 6-311G(d) | Unrestricted | B3LYP | -                             |
| <b>Dpa<sub>2</sub>DBAB<sup>2+</sup></b> | CS | DFT | 6-311G(d) | Default Spin | B3LYP | -                             |
|                                         | OS | DFT | 6-311G(d) | Unrestricted | B3LYP | guess=mix,read <sup>[b]</sup> |
|                                         | T  | DFT | 6-311G(d) | Unrestricted | B3LYP | -                             |
| <b>1<sup>2+</sup></b>                   | CS | DFT | 6-311G(d) | Default Spin | B3LYP | -                             |
|                                         | OS | DFT | 6-311G(d) | Unrestricted | B3LYP | guess=mix                     |
|                                         | T  | DFT | 6-311G(d) | Unrestricted | B3LYP | -                             |
| <b>2<sup>2+</sup></b>                   | CS | DFT | 6-311G(d) | Default Spin | B3LYP | -                             |
|                                         | OS | DFT | 6-311G(d) | Unrestricted | B3LYP | guess=mix                     |
|                                         | T  | DFT | 6-311G(d) | Unrestricted | B3LYP | -                             |

<sup>[a]</sup> CS = closed-shell singlet, OS = open-shell singlet, T = triplet. <sup>[b]</sup> Molecular orbitals of optimized **Dpa<sub>2</sub>DBAB<sup>2+</sup>** (T) were used as initial conditions.

### ***Calculations on the harmonic oscillator model of aromaticity***

The harmonic oscillator model of aromaticity (HOMA) was calculated with the experimental an optimized bond lengths ( $R_i$ ) of **Dpa2DBAB**<sup>2+</sup> according to the following equation:<sup>[12S7]</sup>

$$HOMA = 1 - \frac{\alpha}{n} \sum_i^n (R_{opt} - R_i)^2 \quad [Eq. S6]$$

with an empirical normalization constant  $\alpha = 98.89$ , which gives  $HOMA = 0$  for a model nonaromatic system and  $HOMA = 1$  for a benzene-approximated system where all bonds are equal to the optimal bond length ( $R_{opt} = 1.397 \text{ \AA}$ ).

Here, the  $R_{opt}$  can be represented using the reference values of CC bond lengths in ethane ( $R_{C-C} = 1.524 \text{ \AA}$ ) and ethene ( $R_{C=C} = 1.334 \text{ \AA}$ ) according to the following equation:<sup>[S7]</sup>

$$R_{opt} = \frac{(R_{C-C} + 2R_{C=C})}{3} = 1.397 \text{ \AA} \quad [Eq. S7]$$

where the relation between force constants for single and double bonds are assumed to be 1:2.<sup>[S7]</sup>

### ***Calculations on the diradical characters and singlet-triplet energy gap***

The diradical character  $y$  was calculated from the occupation number of the highest occupied natural orbital ( $n_{HONO}$ ) and of the lowest unoccupied natural orbital ( $n_{LUNO}$ ) according to the following equation:<sup>[14S8]</sup>

$$y = 1 - \frac{2T}{1 + T^2} \quad [Eq. S8]$$

where  $T$  is the orbital overlap between the corresponding orbital pairs, which can be represented using the  $n_{HONO}$  and  $n_{LUNO}$ :<sup>[14S8]</sup>

$$T = \frac{n_{HONO} - n_{LUNO}}{2} \quad [Eq. S9]$$

The singlet-triplet energy gap ( $\Delta E_{S-T}$ ) was calculated with the Yamaguchi spin decontamination correction according to the following equation:<sup>[21S9]</sup>

$$\Delta E_{S-T} = \frac{(E_{OS} - E_T) < S^2 >_T}{< S^2 >_T - < S^2 >_{OS}} \quad [Eq. S10]$$

where  $E_T$  and  $E_{OS}$  represent the summary of the electronic and zero-point energies calculated at triplet (T) and open-shell state (OS).  $\langle S^2 \rangle_T$  and  $\langle S^2 \rangle_{OS}$  correspond to their respective spin contamination.

## Supplemental data on comparisons of structures and diradical characters

**Table S4.** Summary of optimized structures of **Dpa2DBAB**<sup>2+</sup>.

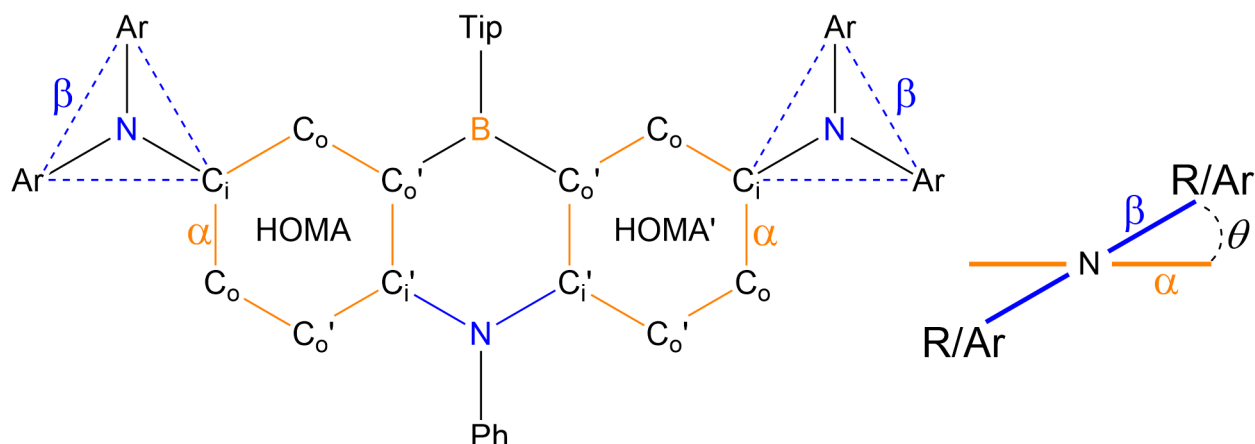

| Structure                  | avg C <sub>i</sub> -N [Å] | avg C <sub>o</sub> -C <sub>o</sub> [Å] | avg $\theta$ [deg]  | avg HOMA <sup>[e]</sup> |
|----------------------------|---------------------------|----------------------------------------|---------------------|-------------------------|
| scXRD                      | 1.374                     | 1.364                                  | 33.3 <sup>[c]</sup> | 0.932                   |
| <b>CS</b> <sup>[a,b]</sup> | 1.383                     | 1.380                                  | 30.9 <sup>[d]</sup> | 0.945                   |
| <b>OS</b> <sup>[a,b]</sup> | 1.399                     | 1.387                                  | 38.3 <sup>[d]</sup> | 0.966                   |
| <b>T</b> <sup>[a,b]</sup>  | 1.404                     | 1.389                                  | 41.1 <sup>[d]</sup> | 0.968                   |

[a] Optimized at (U)B3LYP/6-311G(d) level. [b] **CS** = closed-shell singlet, **OS** = open-shell singlet, **T** = triplet. [c] Estimated from the scXRD-detected structure with Olex2.<sup>[S3]</sup> [d] Estimated using the optimized structures with Mercury 4.0 (ver 4.2.0).<sup>[S10]</sup> [e] The harmonic oscillator model of aromaticity.<sup>[S7]</sup>

**Table S5.** Summary of calculated energy gaps and diradical characters of **Dpa2DBAB**<sup>2+</sup>.

| Structure                  | $E_X$ [Eh] <sup>[d,e]</sup> | $\Delta E_{X-os}$ [kcal mol <sup>-1</sup> ] <sup>[e]</sup> | $y^{[f]}$            | $n_{HONO}$             | $n_{LUNO}$             | $s^2$  |
|----------------------------|-----------------------------|------------------------------------------------------------|----------------------|------------------------|------------------------|--------|
| scXRD                      | -                           | -                                                          | 0.324 <sup>[g]</sup> | 1.38953 <sup>[g]</sup> | 0.61047 <sup>[g]</sup> |        |
| <b>CS</b> <sup>[a,b]</sup> | -3021.480598 <sup>[b]</sup> | +5.87                                                      | 0.326 <sup>[g]</sup> | 1.38774 <sup>[g]</sup> | 0.61226 <sup>[g]</sup> | 0.8733 |
| <b>OS</b> <sup>[a,c]</sup> | -3021.489955 <sup>[c]</sup> | 0                                                          | 0.478 <sup>[c]</sup> | 1.28198 <sup>[c]</sup> | 0.71802 <sup>[c]</sup> | 0.9462 |
| <b>T</b> <sup>[a,c]</sup>  | -3021.488694 <sup>[c]</sup> | +1.48                                                      | -                    | -                      | -                      |        |

[a] **CS** = closed-shell singlet, **OS** = open-shell singlet, **T** = triplet. [b] Optimized/calculated at B3LYP/6-311G(d) level. [c] Optimized/calculated at UB3LYP/6-311G(d) level. [d] The summary of the electronic and zero-point energies. [e] **X** = **CS**, **OS**, **T**. [f] Diradical character. [g] Calculated on the scXRD/**CS** geometry at UB3LYP/6-311G(d) level.

**Table S6.** Selected calculated data of reference compounds dication  $1^{2+}$  and  $2^{2+}$  with reported data

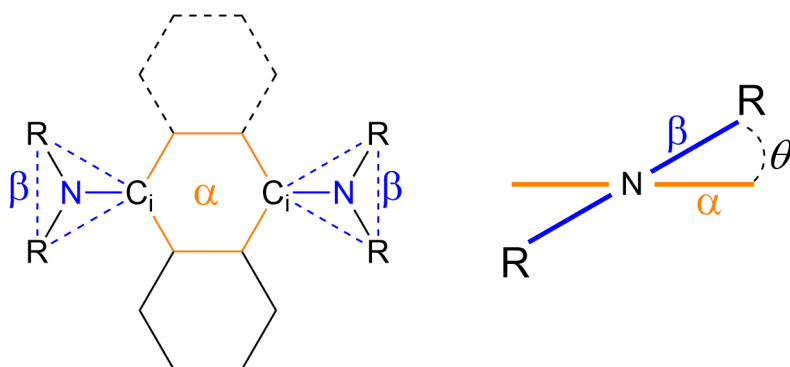

|                       |                                     | avg C <sub>i</sub> -N<br>[Å] | avg $\theta$<br>[deg] | $\Delta E_{X-OS}$<br>[kcal mol <sup>-1</sup> ] <sup>e</sup> | $y^f$              | $n_{HONO}$ | $n_{LUNO}$ |
|-----------------------|-------------------------------------|------------------------------|-----------------------|-------------------------------------------------------------|--------------------|------------|------------|
|                       | <b>CS</b> <sup>a,b</sup>            | 1.385                        | 41.1 <sup>d</sup>     | 1.96                                                        | -                  | -          | -          |
|                       | <b>OS</b> <sup>a,b</sup> This work  | 1.420                        | 51.1 <sup>d</sup>     | 0                                                           | 0.251 <sup>b</sup> | 1.45007    | 0.54993    |
|                       | <b>T</b> <sup>a,b</sup>             | 1.440                        | 60.7 <sup>d</sup>     | 2.78                                                        | -                  | -          | -          |
| <b>1<sup>2+</sup></b> | scXRD                               | 1.354 (3)                    | 33.0                  | -                                                           | -                  | -          | -          |
|                       | <b>CS</b> <sup>a,c</sup> Ref. [S11] | 1.380                        | -                     | 1.82                                                        | -                  | -          | -          |
|                       | <b>OS</b> <sup>a,c</sup>            | 1.400                        | -                     | 0                                                           | 0.18 <sup>g</sup>  | -          | -          |
|                       | <b>T</b> <sup>a,c</sup>             | 1.439                        | -                     | 3.26                                                        | -                  | -          | -          |
|                       | <b>CS</b> <sup>a,c</sup>            | 1.399                        | 54.85 <sup>d</sup>    | 3.71                                                        | -                  | -          | -          |
|                       | <b>OS</b> <sup>a,c</sup> This work  | 1.439                        | 68.67 <sup>d</sup>    | 0                                                           | 0.516 <sup>b</sup> | 1.25831    | 0.74169    |
|                       | <b>T</b> <sup>a,c</sup>             | 1.450                        | 72.86 <sup>d</sup>    | 1.42                                                        | -                  | -          | -          |
| <b>2<sup>2+</sup></b> | scXRD                               | 1.405(4)                     | 56.2                  | -                                                           | -                  | -          | -          |
|                       | <b>CS</b> <sup>a,c</sup> Ref. [S11] | 1.394                        | -                     | 3.26                                                        | -                  | -          | -          |
|                       | <b>OS</b> <sup>a,c</sup>            | 1.437                        | -                     | 0                                                           | 0.63 <sup>g</sup>  | -          | -          |
|                       | <b>T</b> <sup>a,c</sup>             | 1.445                        | -                     | 1.47                                                        | -                  | -          | -          |

[a] **CS** = closed-shell singlet, **OS** = open-shell singlet, **T** = triplet. [b] Optimized at (U)B3LYP/6-311G(d) level. [c] Optimized at (U)B3LYP/6-31G(d) level. [d] Estimated using the DFT-optimized structures with Mercury 4.0 (ver 4.2.0).<sup>[S10]</sup> [e] **X** = **CS**, **OS**, **T**. [f] Diradical character. [g] Calculated at UBHandHLYP/6-31G(d) level.<sup>[S11]</sup>

**Table S7.** Summary of optimized structures of **Dpa2DDAD**<sup>2+</sup> (Ar = 4-*tert*-butylphenyl).

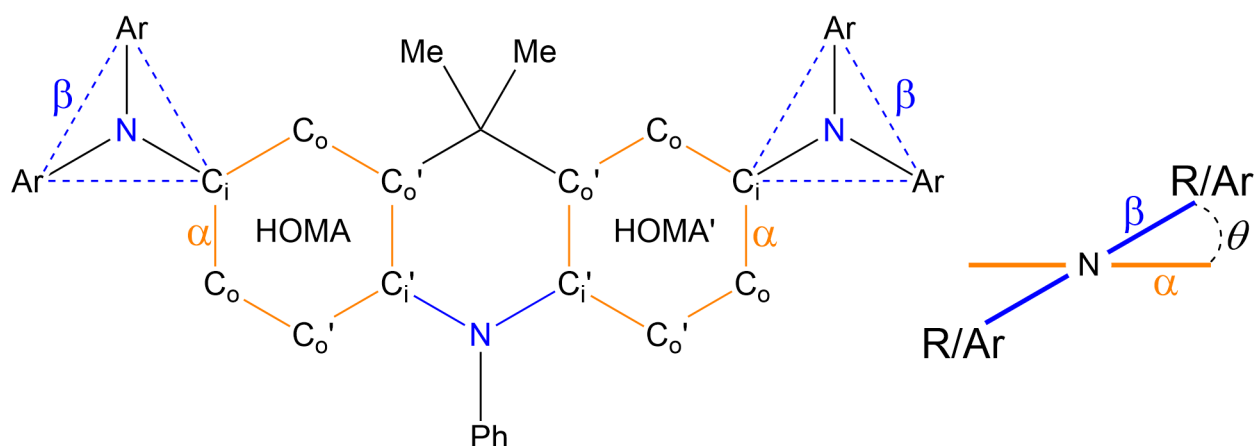

| Structure                  | avg C <sub>i</sub> -N [Å] | avg C <sub>o</sub> -C <sub>o</sub> [Å] | avg θ [deg]         | avg HOMA <sup>[e]</sup> |
|----------------------------|---------------------------|----------------------------------------|---------------------|-------------------------|
| <b>CS</b> <sup>[a,b]</sup> | 1.379                     | 1.372                                  | 26.4 <sup>[d]</sup> | 0.941                   |
| <b>OS</b> <sup>[a,b]</sup> | 1.376                     | 1.372                                  | 26.4 <sup>[d]</sup> | 0.941                   |
| <b>T</b> <sup>[a,b]</sup>  | 1.400                     | 1.382                                  | 36.7 <sup>[d]</sup> | 0.980                   |

[a] Optimized at (U)B3LYP/6-311G(d) level. [b] **CS** = closed-shell singlet, **OS** = open-shell singlet, **T** = triplet. [c] Estimated from the scXRD-detected structure with Olex2.<sup>[S3]</sup> [d] Estimated using the optimized structures with Mercury 4.0 (ver 4.2.0).<sup>[S10]</sup> [e] The harmonic oscillator model of aromaticity.<sup>[S7]</sup>

**Table S8.** Summary of calculated energy gaps and diradical characters of **Dpa2DDAD**<sup>2+</sup>.

| Structure                  | $E_X$ [Eh] <sup>[d,e]</sup> | $\Delta E_{X-OS}$ [kcal mol <sup>-1</sup> ] <sup>[e]</sup> | $y$ <sup>[f]</sup> | $n_{HONO}$ | $n_{LUNO}$ |
|----------------------------|-----------------------------|------------------------------------------------------------|--------------------|------------|------------|
| <b>CS</b> <sup>[a,b]</sup> | -2529.226087 <sup>[b]</sup> | 0                                                          | -                  | -          | -          |
| <b>OS</b> <sup>[a,c]</sup> | -2529.225087 <sup>[c]</sup> | 0                                                          | 0                  | -          | -          |
| <b>T</b> <sup>[a,c]</sup>  | -2529.227747 <sup>[c]</sup> | +1.04                                                      | -                  | -          | -          |

[a] **CS** = closed-shell singlet, **OS** = open-shell singlet, **T** = triplet. [b] Optimized/calculated at B3LYP/6-311G(d) level. [c] Optimized/calculated at UB3LYP/6-311G(d) level. [d] The summary of the electronic and zero-point energies. [e] **X** = **CS**, **OS**, **T**. [f] Diradical character. [g] Calculated on the scXRD/**CS** geometry at UB3LYP/6-311G(d) level.

## Supplemental details of TD-DFT calculations

Based on the optimized ground state structure of **Dpa2DBAB**<sup>2+</sup> at CS, OS and T sates, respectively, twenty excited singlet states and twenty excited triplet states were calculated. Additionally, twenty excited singlet states and twenty excited triplet states of **Dpa2DBAB** as well as twenty excited doublet states of **Dpa2DBAB**<sup>+</sup> were calculated based on the optimized structure at the same level. Simulated absorption spectra and selected MOs relevant for calculated excited states of **Dpa2DBAB**, **Dpa2DBAB**<sup>1+</sup> and **Dpa2DBAB**<sup>2+</sup> are shown below

**Table S9.** Summary of methods used for TD-DFT calculations<sup>[a,b]</sup>

| Compound                     |           | Method    |              |              | Additional Conditions |           |
|------------------------------|-----------|-----------|--------------|--------------|-----------------------|-----------|
| <b>Dpa2DBAB</b>              | DFT       | 6-311G(d) | Default Spin | B3LYP        | -                     |           |
| <b>Dpa2DBAB<sup>1+</sup></b> | DFT       | 6-311G(d) | Unrestricted | B3LYP        | -                     |           |
| <b>Dpa2DBAB<sup>2+</sup></b> | <b>CS</b> | DFT       | 6-311G(d)    | Default Spin | B3LYP                 | -         |
|                              | <b>OS</b> | DFT       | 6-311G(d)    | Unrestricted | B3LYP                 | guess=mix |
|                              | <b>T</b>  | DFT       | 6-311G(d)    | Unrestricted | B3LYP                 | -         |

[a] CS = closed-shell singlet, OS = open-shell singlet, T = triplet. [b] Calculated on geometries optimized at (U)B3LYP/6-311G(d) level.

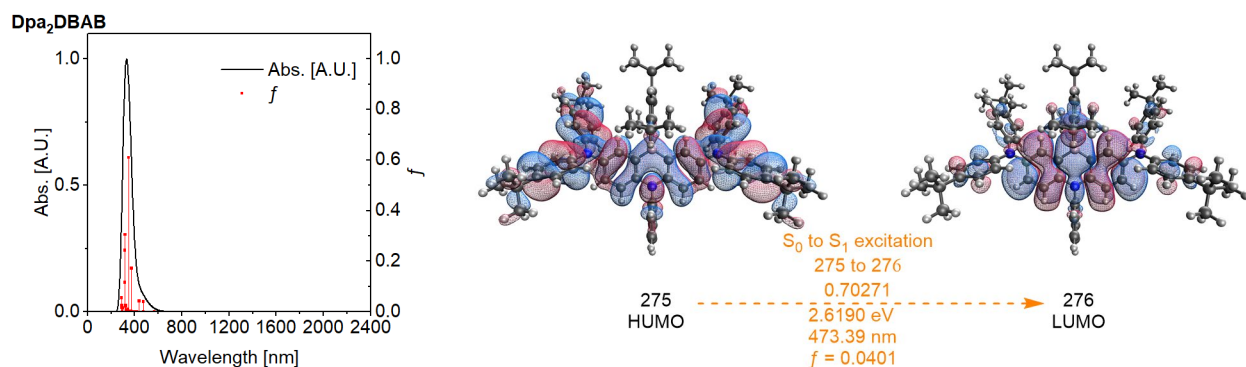

**Figure S8.** Simulated absorption spectra of **Dpa2DBAB** with selected MOs relevant for calculated first allowed excited state.

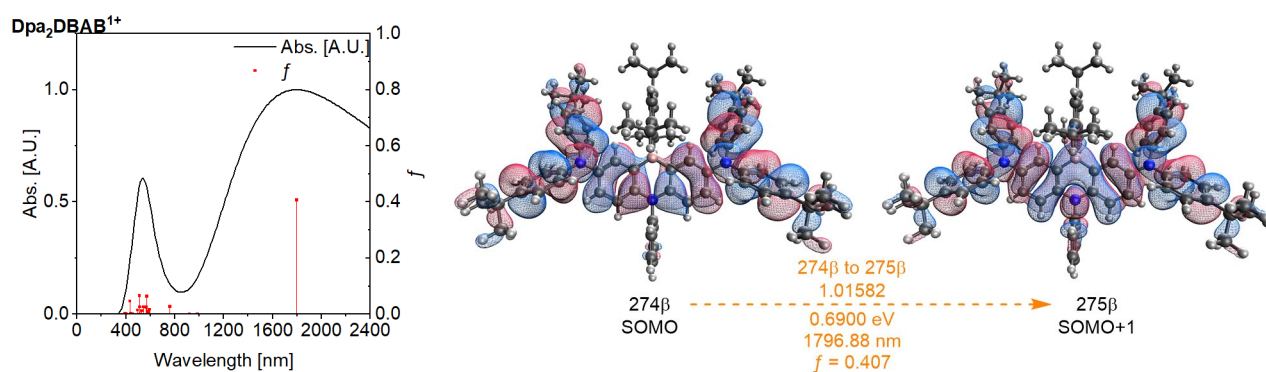

**Figure S9.** Simulated absorption spectra of **Dpa2DBAB**<sup>+</sup> with selected MOs relevant for calculated first allowed excited state



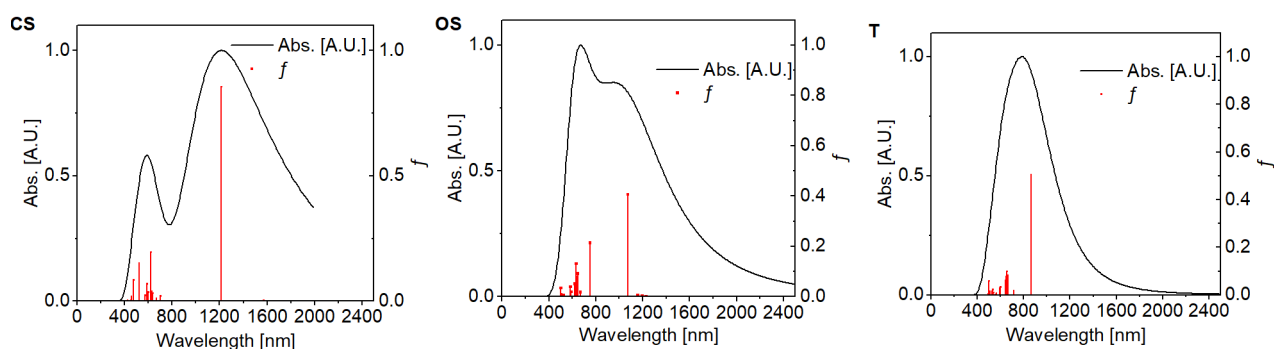

**Figure S10.** Simulated absorption spectra of **Dpa2DBAB<sup>2+</sup>** (right: CS, middle: OS, left: T)

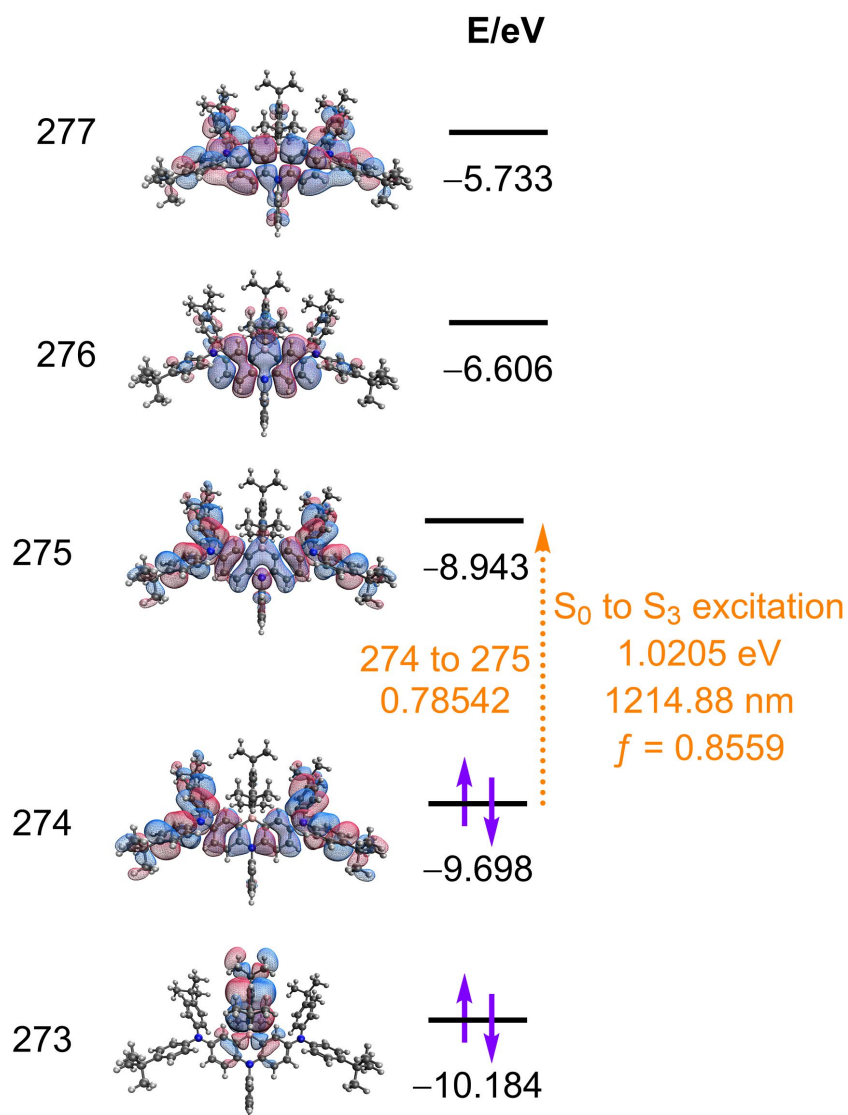

**Figure S11.** Selected MOs relevant for calculated first allowed excited state of **Dpa2DBAB<sup>2+</sup>** at CS state.

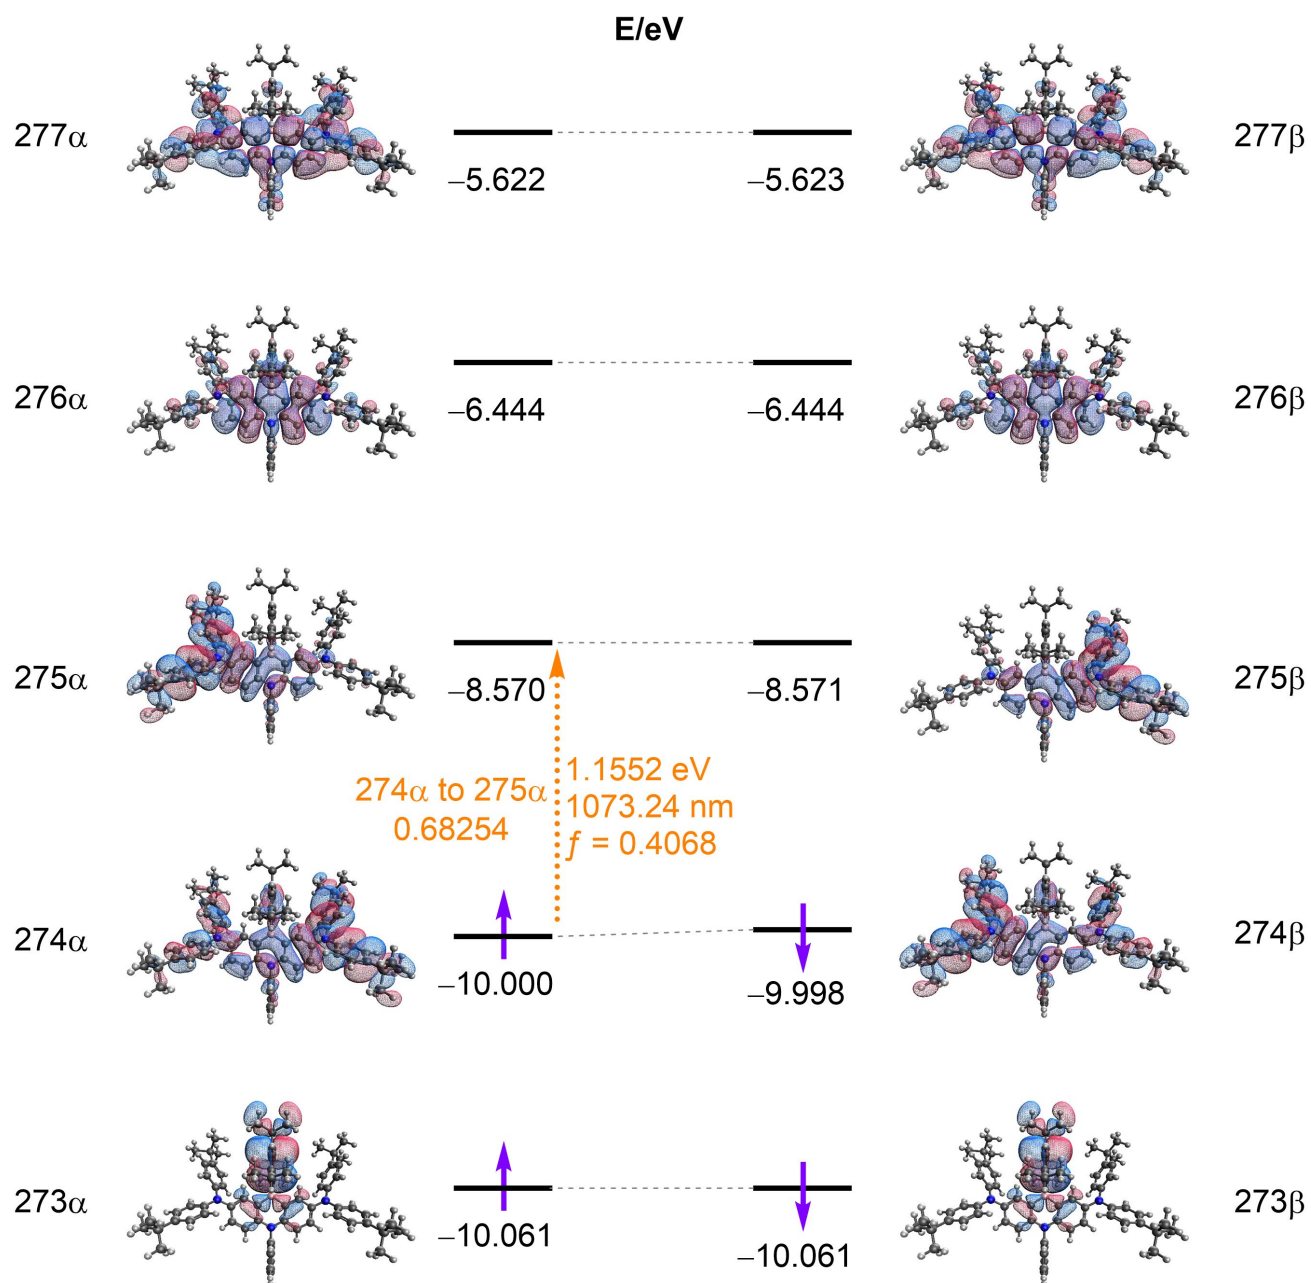

**Figure S12.** Selected MOs relevant for calculated first allowed excited state of **Dpa2DBAB<sup>2+</sup>** (OS).

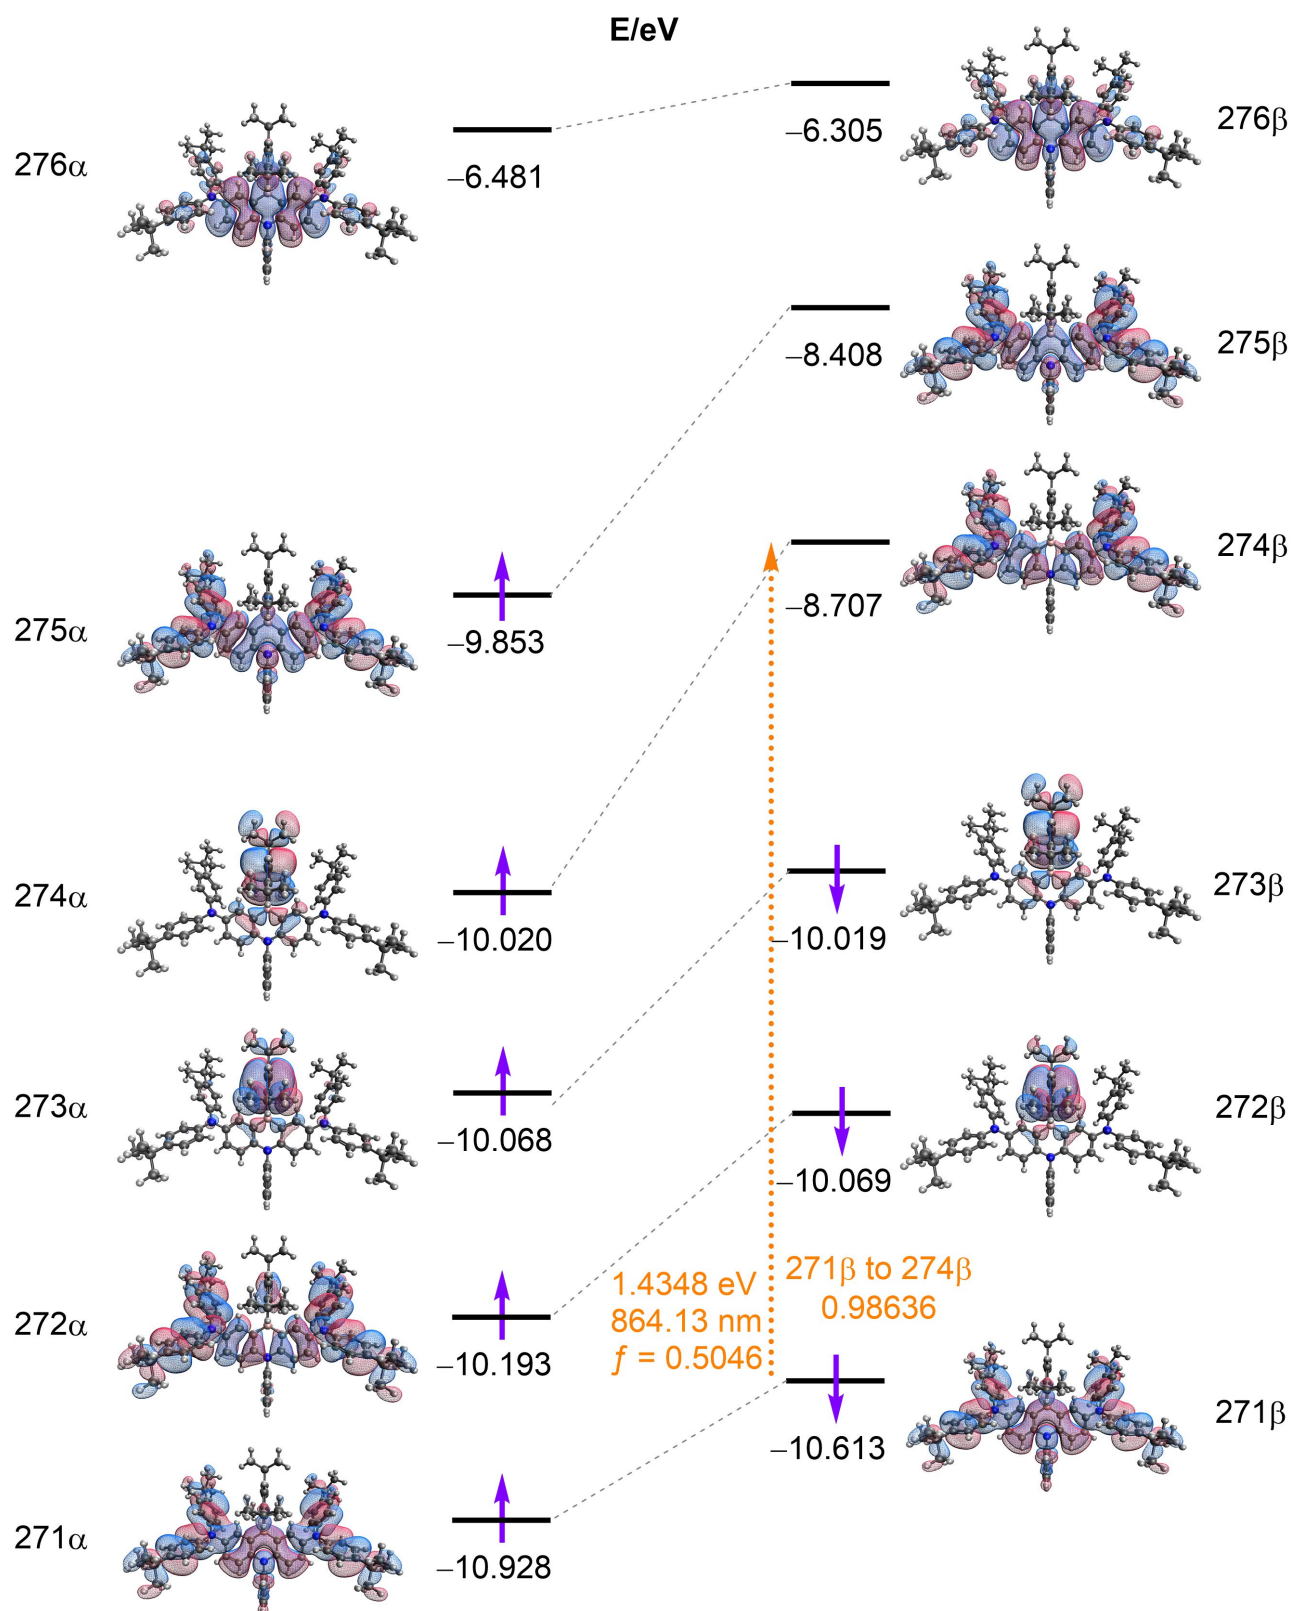

**Figure S13.** Selected MOs relevant for calculated first allowed excited state of **Dpa<sub>2</sub>DBAB<sup>2+</sup> (T)**.

### Supplemental details of NICS calculations

Based on the optimized ground state structure of **Dpa2DBABA** and **Dpa2DBAB<sup>2+</sup>** at **CS**, **OS** and **T** states, respectively, NICS(0) and NICS(1) values of the rings in dibenzo-1,4-azaborine moiety were calculated.<sup>[S12]</sup> The Bq atoms were added with py.Aroma (version 4.1.0).<sup>[S13]</sup> The XY Cartesian plane of geometries used to NICS(1)<sub>zz</sub> calculations were operated to parallel to the plane defined by the [1,4]-azaborine moiety with Multiwfn(version 3.8).<sup>[S14]</sup>

**Table S10.** Summary of methods used for TD-DFT calculations<sup>[a]</sup>

| Compound                       |                          | Method |            |              | Additional Conditions |           |
|--------------------------------|--------------------------|--------|------------|--------------|-----------------------|-----------|
| <b>Dpa2DBAB</b> <sup>[b]</sup> |                          | HF     | 6-311+G(d) | Default Spin | B3LYP                 | -         |
|                                | scXRD <sup>[c]</sup>     | HF     | 6-311G+(d) | Default Spin | B3LYP                 | -         |
|                                | <b>CS</b> <sup>[b]</sup> | HF     | 6-311G+(d) | Default Spin | B3LYP                 | -         |
| <b>Dpa2DBAB<sup>2+</sup></b>   | <b>OS</b> <sup>[b]</sup> | UHF    | 6-311+G(d) | Unrestricted | B3LYP                 | guess=mix |
|                                | <b>T</b> <sup>[b]</sup>  | UHF    | 6-311+G(d) | Unrestricted | B3LYP                 | -         |

[a] **CS** = closed-shell singlet, **OS** = open-shell singlet, **T** = triplet. [b] Calculated on geometries optimized at (U)B3LYP/6-311G(d) level. [c] Calculated on the scXRD geometry.

**Table S11.** Summary of calculated NICS(1)<sub>zz</sub> values of the rings in dibenzo-1,4-azaborine moiety

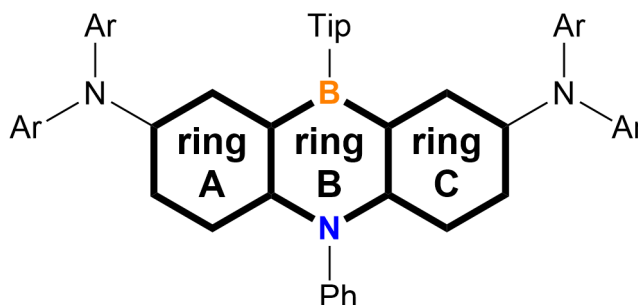

|                              |           | ring A            |                    | ring B            |                    | ring C            |                    |
|------------------------------|-----------|-------------------|--------------------|-------------------|--------------------|-------------------|--------------------|
| Compound                     |           | NICS              | NICS               | NICS              | NICS               | NICS              | NICS               |
|                              |           | (1) <sub>zz</sub> | (−1) <sub>zz</sub> | (1) <sub>zz</sub> | (−1) <sub>zz</sub> | (1) <sub>zz</sub> | (−1) <sub>zz</sub> |
|                              |           | [ppm]             | [ppm]              | [ppm]             | [ppm]              | [ppm]             | [ppm]              |
| <b>Dpa2DBAB</b>              |           | −26.9221          | −26.4566           | −6.2138           | −5.7637            | −26.9260          | −26.4145           |
| <b>Dpa2DBAB<sup>2+</sup></b> | scXRD     | −8.4502           | −7.9671            | +8.5886           | +9.9581            | −7.1072           | −7.0676            |
|                              | <b>CS</b> | −7.2121           | −6.8684            | +9.3248           | +10.3244           | −7.2831           | −6.9468            |
|                              | <b>OS</b> | −14.3435          | −13.9333           | −1.0983           | −0.5336            | −14.3516          | −13.9483           |
|                              | <b>T</b>  | −16.7545          | −16.2792           | −2.9244           | −2.4023            | −16.7546          | −16.2885           |

[a] **CS** = closed-shell singlet, **OS** = open-shell singlet, **T** = triplet. [b] Calculated on geometries optimized at (U)B3LYP/6-311G(d) level. [c] Calculated on the scXRD geometry.

*Supplemental details of calculations on the Mulliken charge distribution*

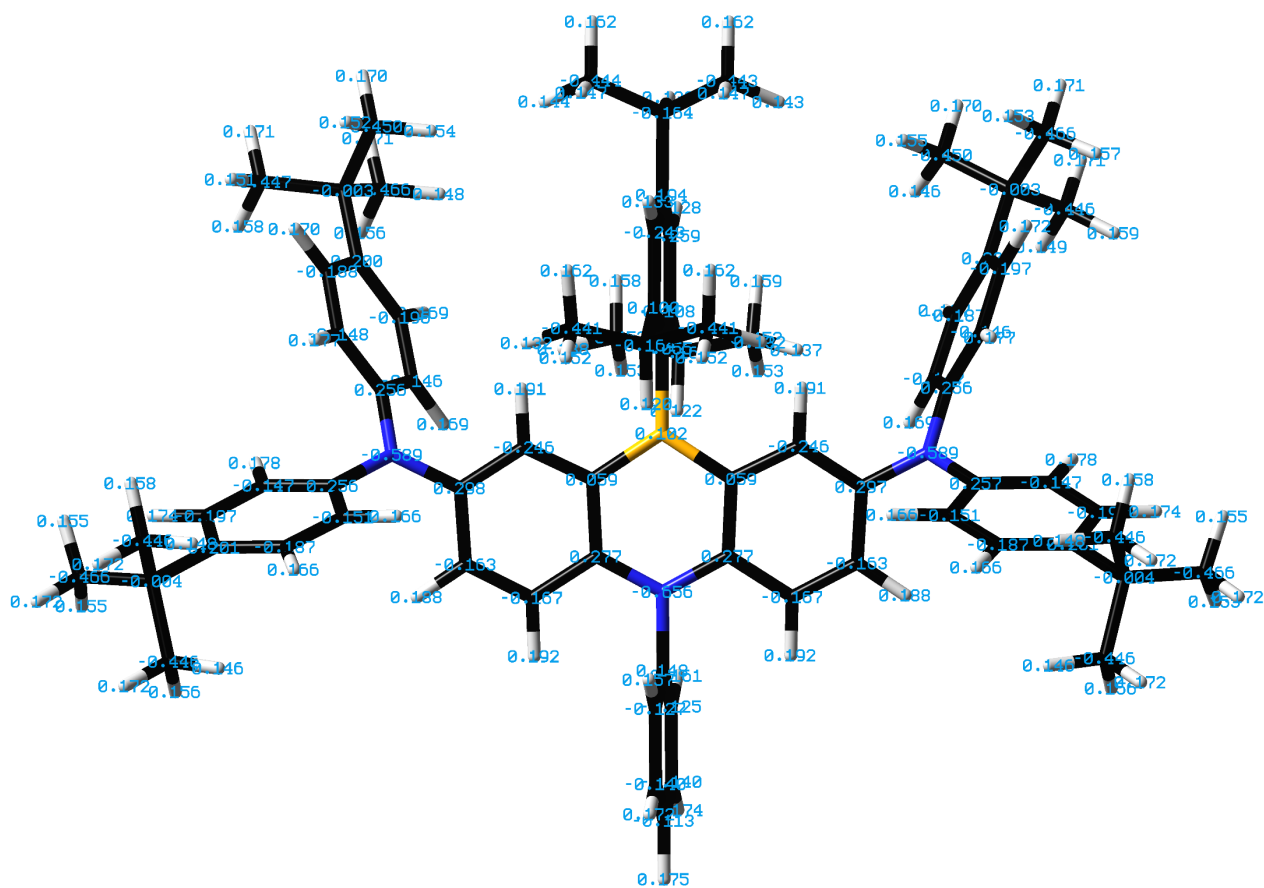

**Figure S14.** The Mulliken charge distribution of **Dpa2DBAB<sup>2+</sup>** at the **OS** state calculated at UB3LYP/6-311G(d) level.

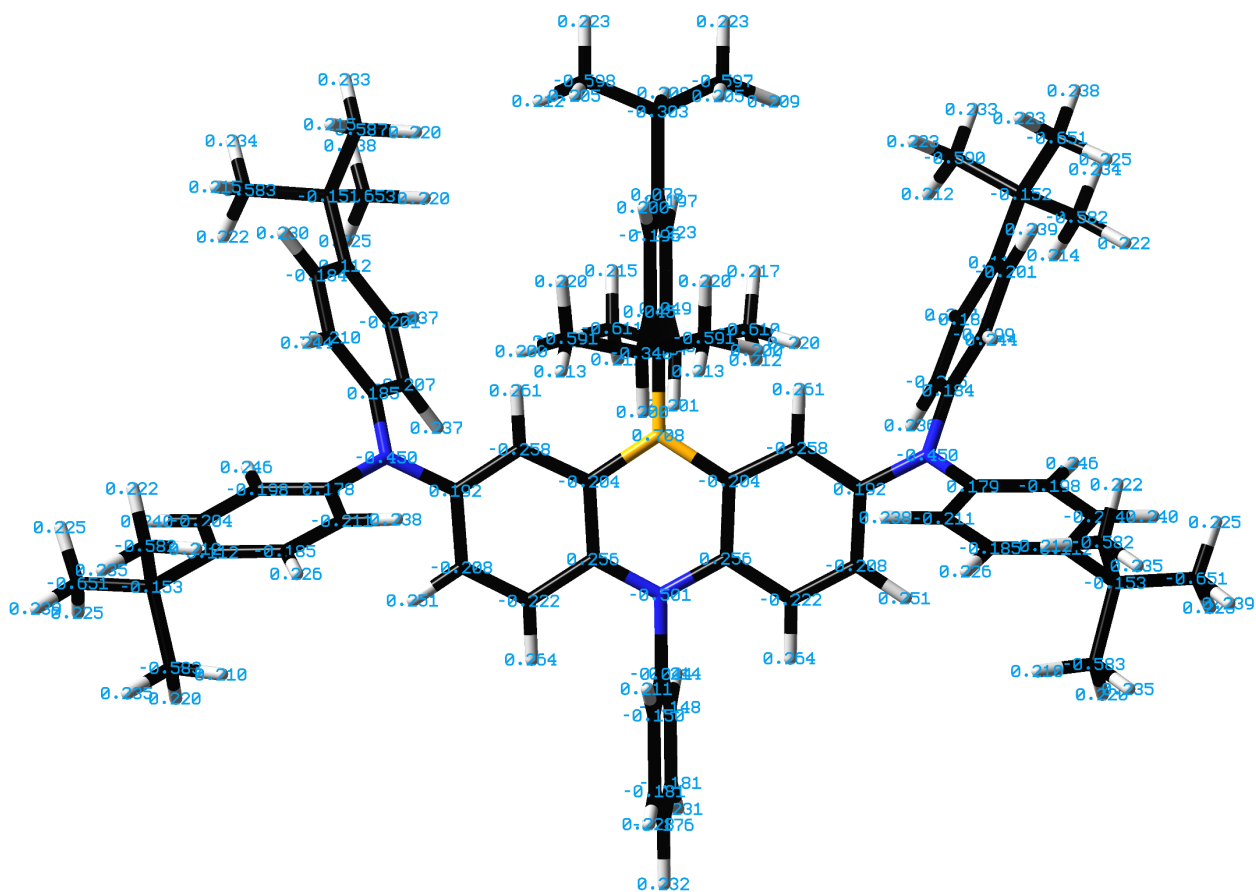

**Figure S15.** The Mulliken charge distribution of **Dpa2DBAB<sup>2+</sup>** at the **T** state calculated at UB3LYP/6-311G(d) level.

***Supplemental details of calculations on spin density***

Based on the optimized ground state structure of **Dpa<sub>2</sub>DBAB<sup>2+</sup>** at OS and T states, respectively, spin densities were calculated at UB3LYP/6-311G(d) level.

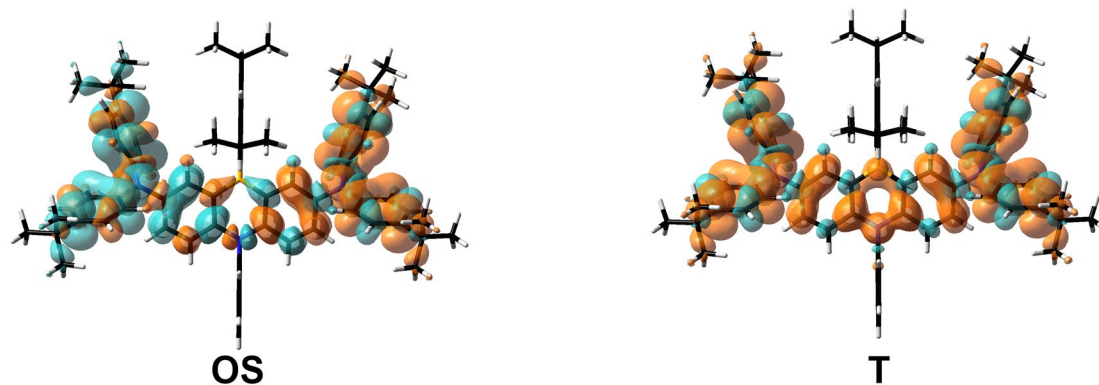

**Figure S16.** The spin density maps of **Dpa<sub>2</sub>DBAB<sup>2+</sup>** at the OS (right) and T (left) states calculated at UB3LYP/6-311G(d) level.

## S7. References

- [S1] T.-L. Wu, S.-H. Lo, Y.-C. Chang, M.-J. Huang, C.-H. Cheng, *ACS Appl. Mater. Interfaces* **2019**, *11*, 10768–10776.
- [S2] S. Suzuki, K. Okada, *Organic Redox Systems*, (Ed.: T. Nishinaga), John Wiley & Sons, New Jersey, **2016**, Chapter 8, pp. 269–285.
- [S3] O. V. Dolomanov, L. J. Bourhis, R. J. Gildea, J. A. K. Howard, H. Puschmann, *J. Appl. Cryst.* **2009**, *42*, 339–341, (2009).
- [S4] G. M. Sheldrick, *Acta Cryst.* **2015**, *71*, 3–8.
- [S5] Deposition number 2387211 (for **[Dpa<sub>2</sub>DBAB](SbF<sub>6</sub>)<sub>2</sub>)** contains the supplementary crystallographic data for this paper. This data are provided free of charge by the joint Cambridge Crystallographic Data Centre and Fachinformationszentrum Karlsruhe Access Structures service.
- [S6] Gaussian 16, Revision C.02, M. J. Frisch, G. W. Trucks, H. B. Schlegel, G. E. Scuseria, M. A. Robb, J. R. Cheeseman, G. Scalmani, V. Barone, G. A. Petersson, H. Nakatsuji, X. Li, M. Caricato, A. V. Marenich, J. Bloino, B. G. Janesko, R. Gomperts, B. Mennucci, H. P. Hratchian, J. V. Ortiz, A. F. Izmaylov, J. L. Sonnenberg, D. Williams-Young, F. Ding, F. Lipparini, F. Egidi, J. Goings, B. Peng, A. Petrone, T. Henderson, D. Ranasinghe, V. G. Zakrzewski, J. Gao, N. Rega, G. Zheng, W. Liang, M. Hada, M. Ehara, K. Toyota, R. Fukuda, J. Hasegawa, M. Ishida, T. Nakajima, Y. Honda, O. Kitao, H. Nakai, T. Vreven, K. Throssell, J. A. Montgomery, Jr., J. E. Peralta, F. Ogliaro, M. J. Bearpark, J. J. Heyd, E. N. Brothers, K. N. Kudin, V. N. Staroverov, T. A. Keith, R. Kobayashi, J. Normand, K. Raghavachari, A. P. Rendell, J. C. Burant, S. S. Iyengar, J. Tomasi, M. Cossi, J. M. Millam, M. Klene, C. Adamo, R. Cammi, J. W. Ochterski, R. L. Martin, K. Morokuma, O. Farkas, J. B. Foresman, and D. J. Fox, Gaussian, Inc., Wallingford CT, 2019.
- [S7] a) T. M. Krygowski, H. Szatyłowicz, O. A. Stasyuk, J. Dominikowska, M. Palusiak, *Chem Rev.* **2014**, *114*, 6383–6422; b) J. Kruszewski, T.M. Krygowski, *Tetrahedron Lett.* **1972**, *13*, 3839; c) O. Bastiansen, M. Trætteberg, *Tetrahedron* **1962**, *17*, 147. d) Wilson, E. B., Jr.; Decius, J. C.; Cross, P. C. *Molecular Vibrations*, Dover, New York, **1955**, p. 174; e) *Physical Methods in Organic Chemistry*, Ed.: J. C. P. Schwarz, OLIVER & BOYD, Edinburgh & London, **1964**, p. 148. f) G. A. Jeffrey, J. R. Ruble, R. K. McMullan, J. A. Pople, *Proc. R. Soc. London* **1987**, *A414*, 47.
- [S8] K. Yamaguchi, *Chem. Phys. Lett.* **1975**, *33*, 330–335.
- [S9] a) K. Yamaguchi, Y. Takahara, T. Fueno, K. Nasu, *Jpn. J. Appl. Phys.* 1987, *26*, L1362–L1364; b) K. Yamaguchi, F. Jensen, A. Dorigo, K. N. Houk, *Chem. Phys. Lett.* 1988, *149*, 537–542.
- [S10] C. F. Macrae, I. Sovago, S. J. Cottrell, P. T. A. Galek, P. McCabe, E. Pidcock, M. Platings, G. P. Shields, J. S. Stevens, M. Towler, P. A. Wood, *J. Appl. Cryst.* **2020**, *53*, 226–235.
- [S11] Y. Su, X. Wang, Y. Li, Y. Song, Y. Sui, X. Wang, *Angew. Chem. Int. Ed.* **2015**, *54*, 1634–1637
- [S12] a) Z. Chen, C. S. Wannere, C. Corminboeuf, R. Puchta, P. v. R. Schleyer, *Chem. Rev.* **2005**, *105*, 3842–3888; b) H. Fallah-Bagher-Shaidei, C. S. Wannere, C. Corminboeuf, R. Puchta, P. v. R. Schleyer, *Org. Lett.* **2006**, *8*, 863–866. c) P. v. R. Schleyer, C. Maerker, A. Dransfeld, H. Jiao, N. J. R. v. E. Hommes, *J. Am. Chem. Soc.* **1996**, *118*, 6317–6318.
- [S13] Z. Wang, *ChemRxiv preprint* **2024**, DOI: 10.26434/chemrxiv-2024-mjmj8.



[S14] a) T. Lu, F. Chen, *J. Comput. Chem.* **2012**, *33*, 580–592. b) T. Lu, *J. Chem. Phys.* **2024**, *161*, 082503.

## S8. NMR Charts

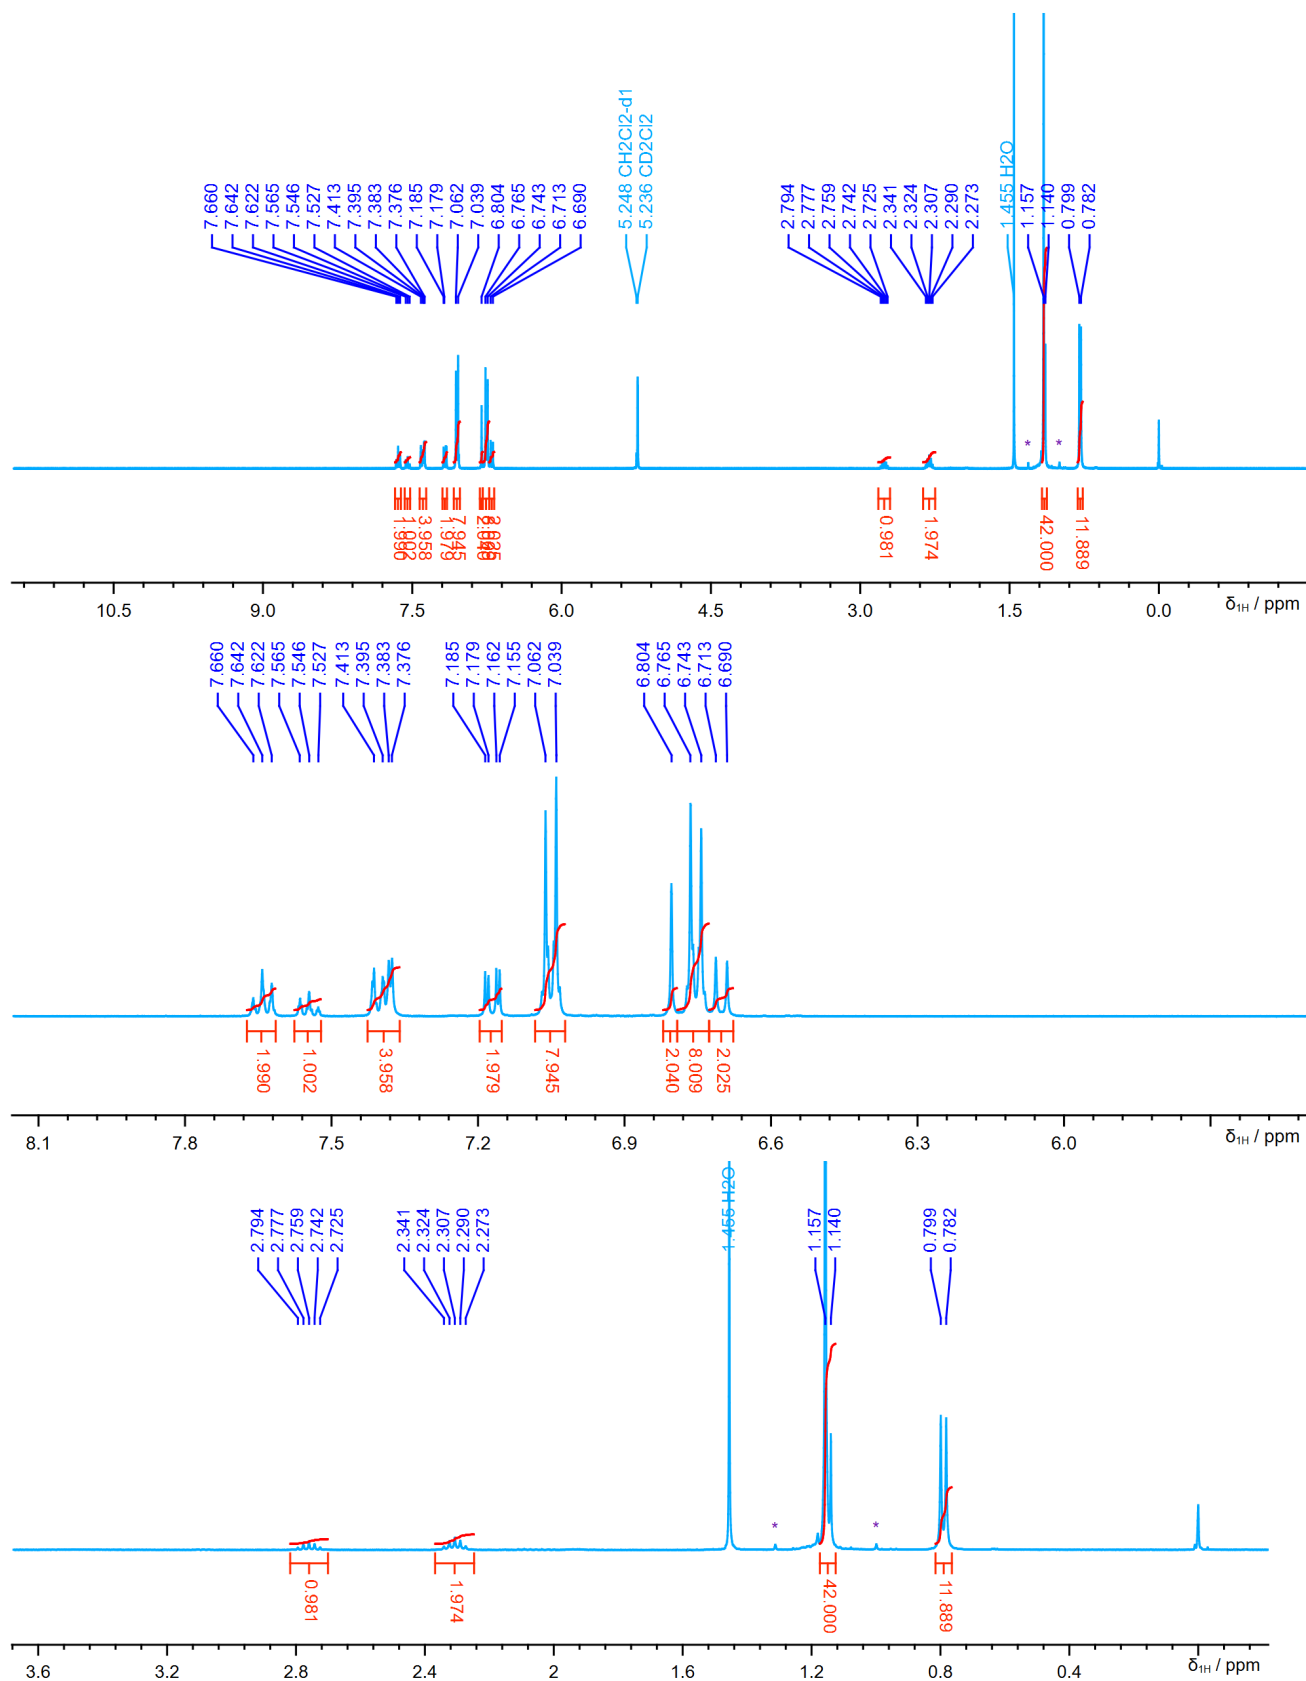

**Figure S17.**  $^1\text{H}$ -NMR charts of **Dpa<sub>2</sub>DBAB** in  $\text{CD}_2\text{Cl}_2$  at 293 K (top: fullscale, middle: enlarged view of aromatic region, bottom: enlarged view of aliphatic region). \*: side band.

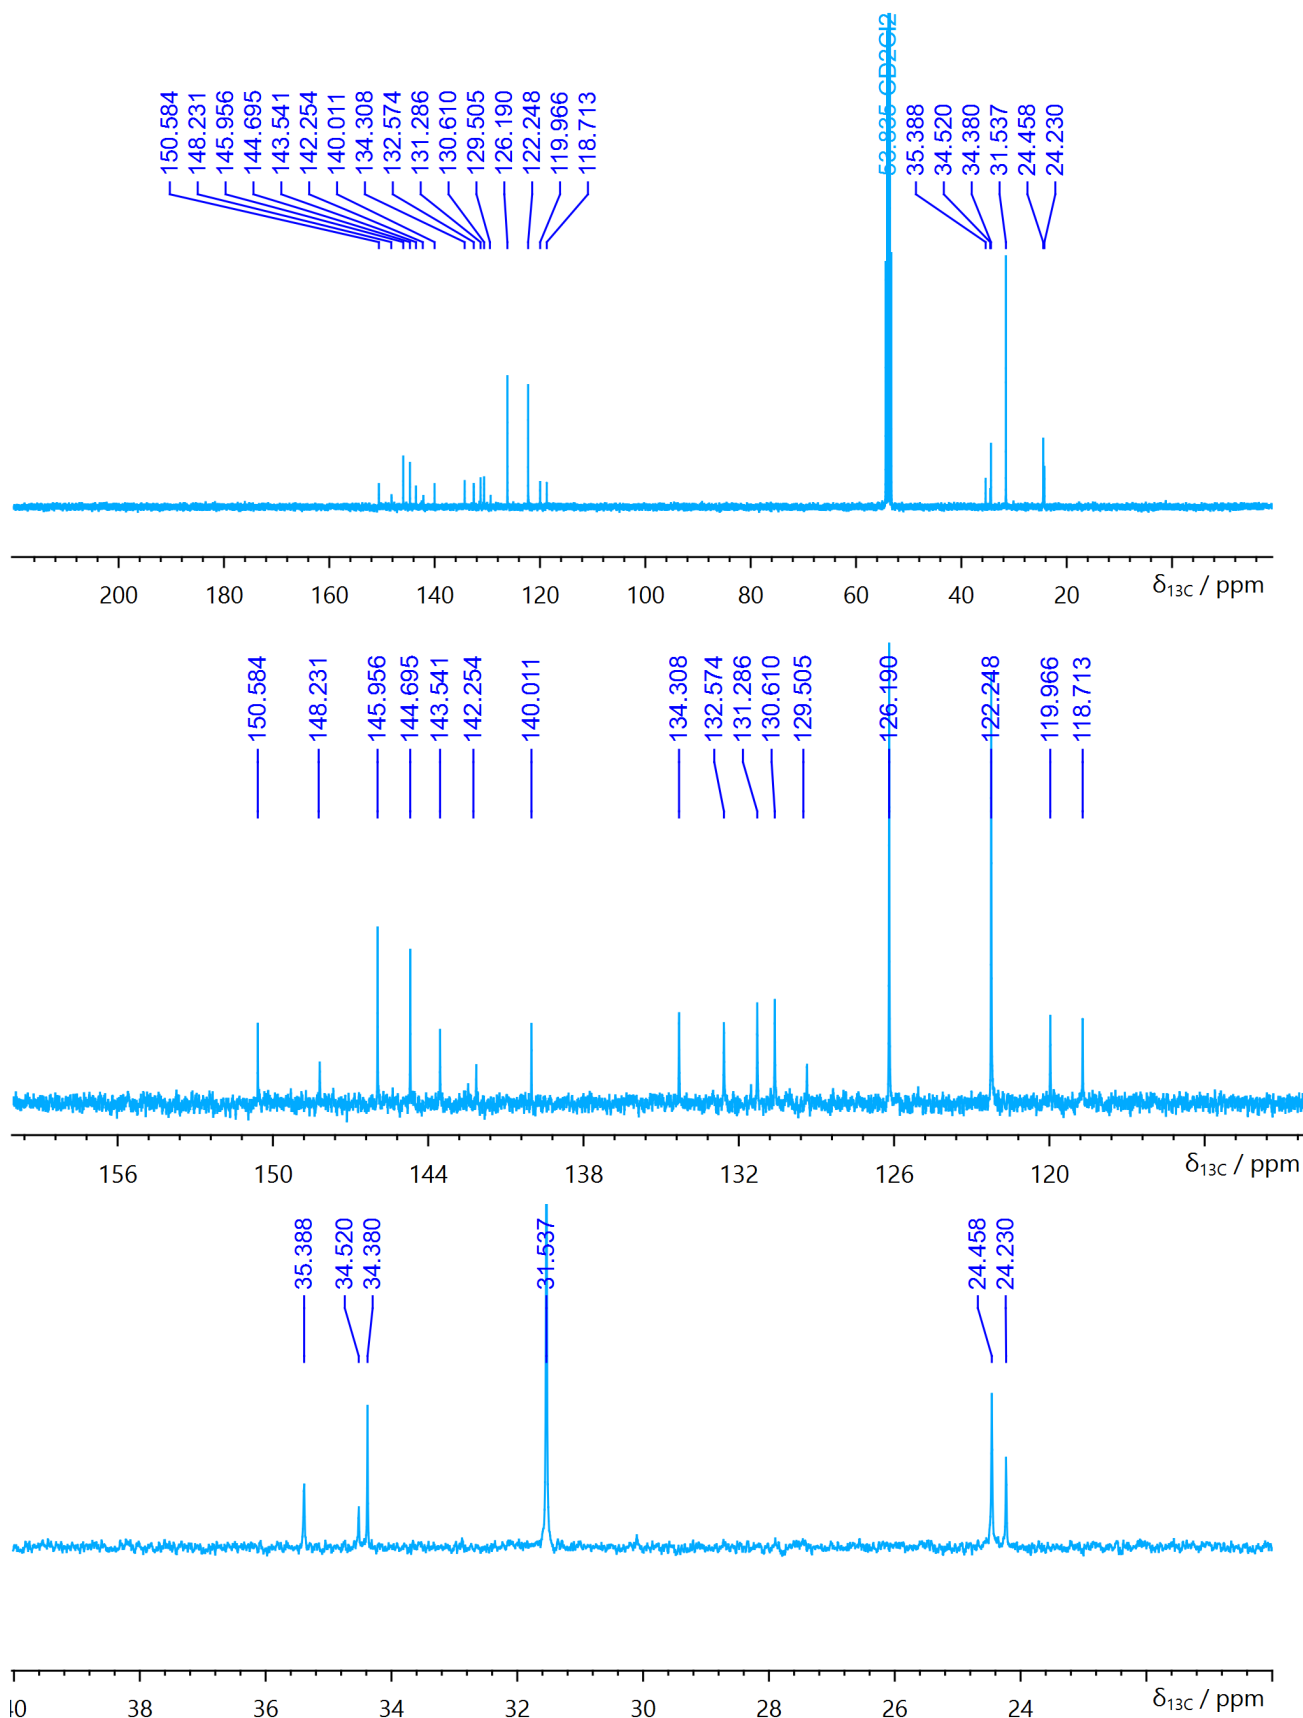

**Figure S18.**  $^{13}\text{C}$ -NMR charts of **Dpa2DBAB** in  $\text{CD}_2\text{Cl}_2$  at 293 K (top: fullscale, middle: enlarged view of aromatic region, bottom: enlarged view of aliphatic region).

## S9. HR-MS

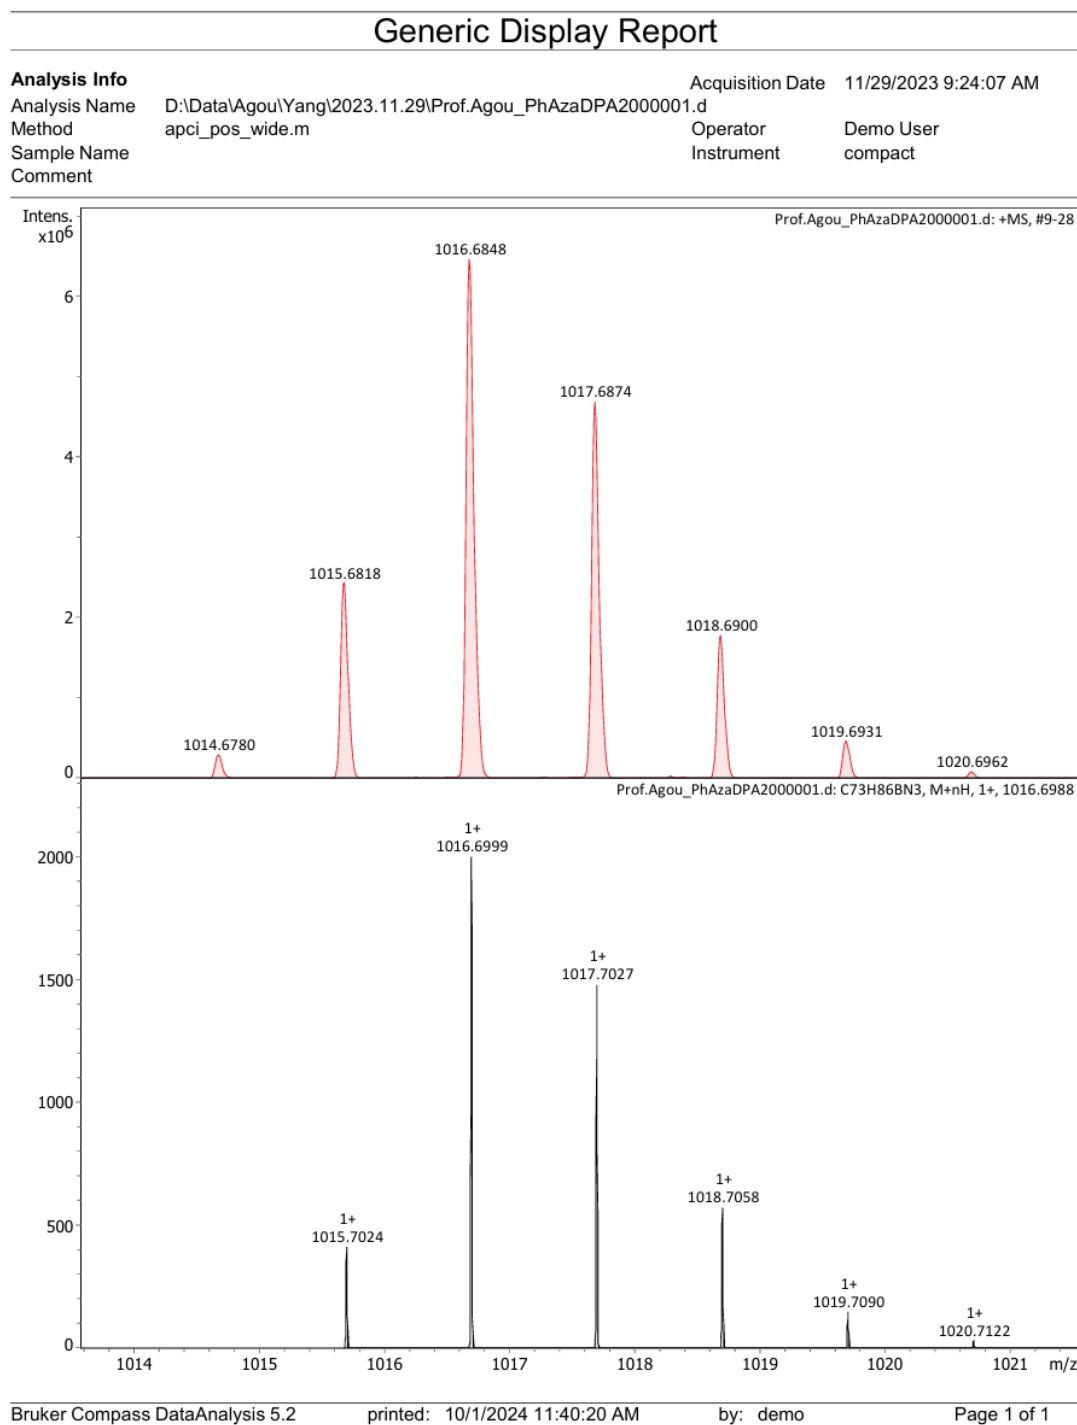

**Figure S19.** Isotopic patterns of the found parent ions **Dpa<sub>2</sub>DBABA<sup>+</sup>+nH** of recorded HR-MS of **Dpa<sub>2</sub>DBABA** (APCI, Positive, in DCM).

## Generic Display Report

### Analysis Info

Analysis Name D:\Data\Agou\Yang\2024.02.20\20240220\_000004.d  
Method esi\_pos\_wide.m  
Sample Name DBABSbF6\_ESI  
Comment

Acquisition Date 2/20/2024 9:56:35 AM

Operator Demo User  
Instrument compact

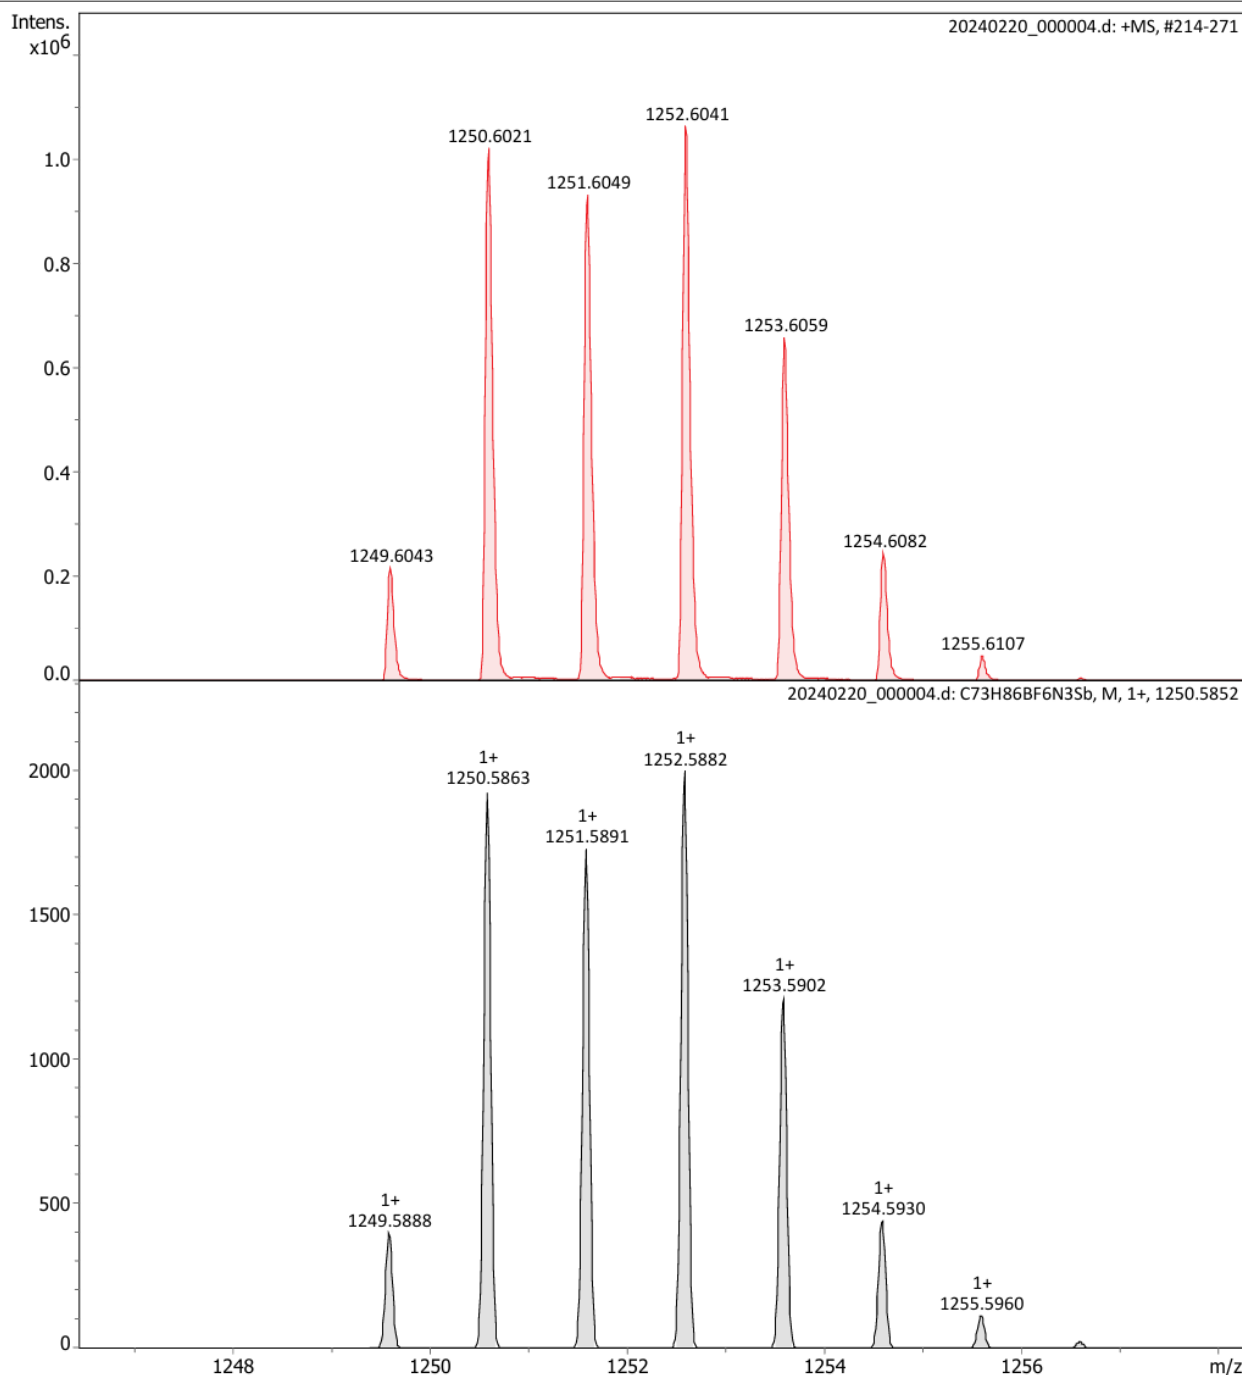

Bruker Compass DataAnalysis 5.2

printed: 2/20/2024 10:52:57 AM

by: demo

Page 1 of 1

**Figure S20.** Isotopic patterns of the found parent ions  $[\text{Dpa}_2\text{DBABA}](\text{SbF}_6)^+$  recorded in the HR-MS. of  $[\text{Dpa}_2\text{DBABA}](\text{SbF}_6)_2$  (ESI, Positive, in DCM).
